# Supplementary material for: The impact of the Syrian conflict on population well-being
Source: PubMed Central journal article supplement (PMC7411009; doi:10.1038/s41467-020-17369-0), 2020-08-06
Supplement: 41467_2020_17369_MOESM1_ESM.pdf [file 41467_2020_17369_MOESM1_ESM.pdf]

## **Supplementary Information**

### **The Impact of the Syrian Conflict on Population Well-being**

Cheung et al.

Corresponding author: Dr. Felix Cheung

Email: [felixckc@hku.hk](mailto:felixckc@hku.hk)

#### **The supplementary file includes:**

Supplementary Figures 1 to 5

Supplementary Tables 1 to 15

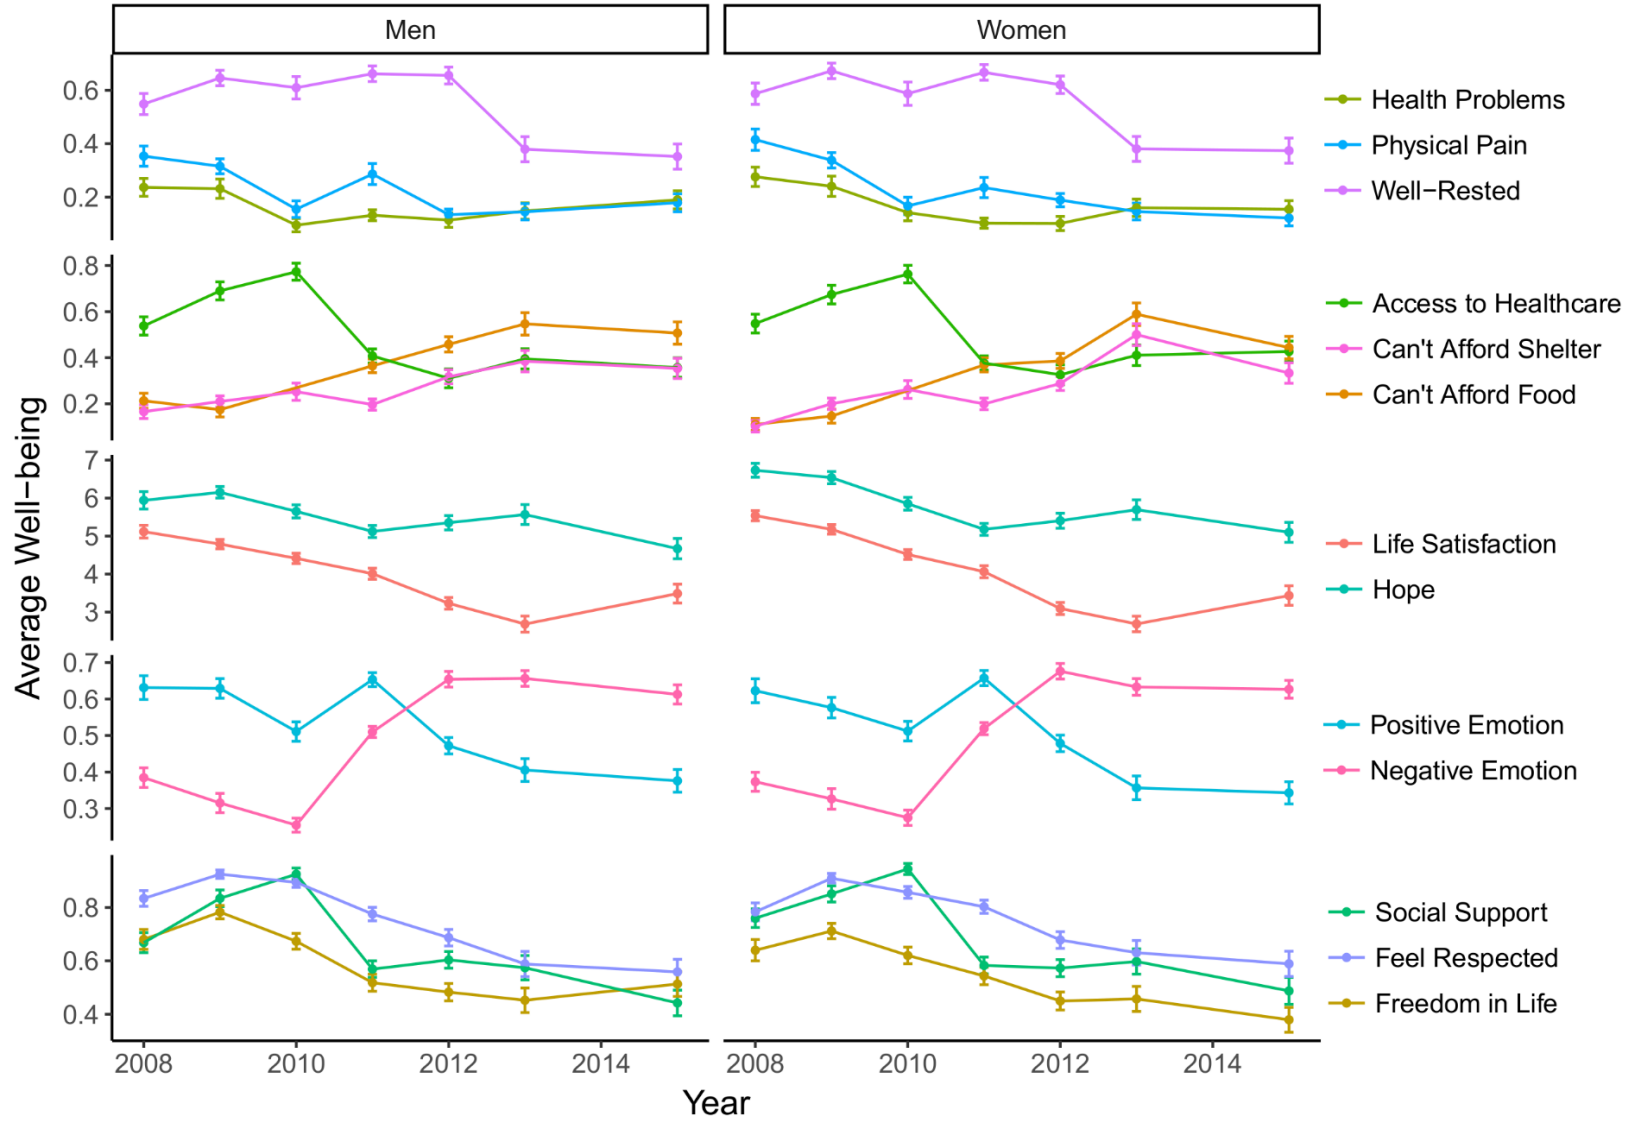

**Supplementary Figure 1. Sex-specific trends in well-being in Syria from 2008 to 2015.** Error bars indicate 95% CI ( $\pm 1.96 \times$  standard error). Source data are provided as a Source Data file.

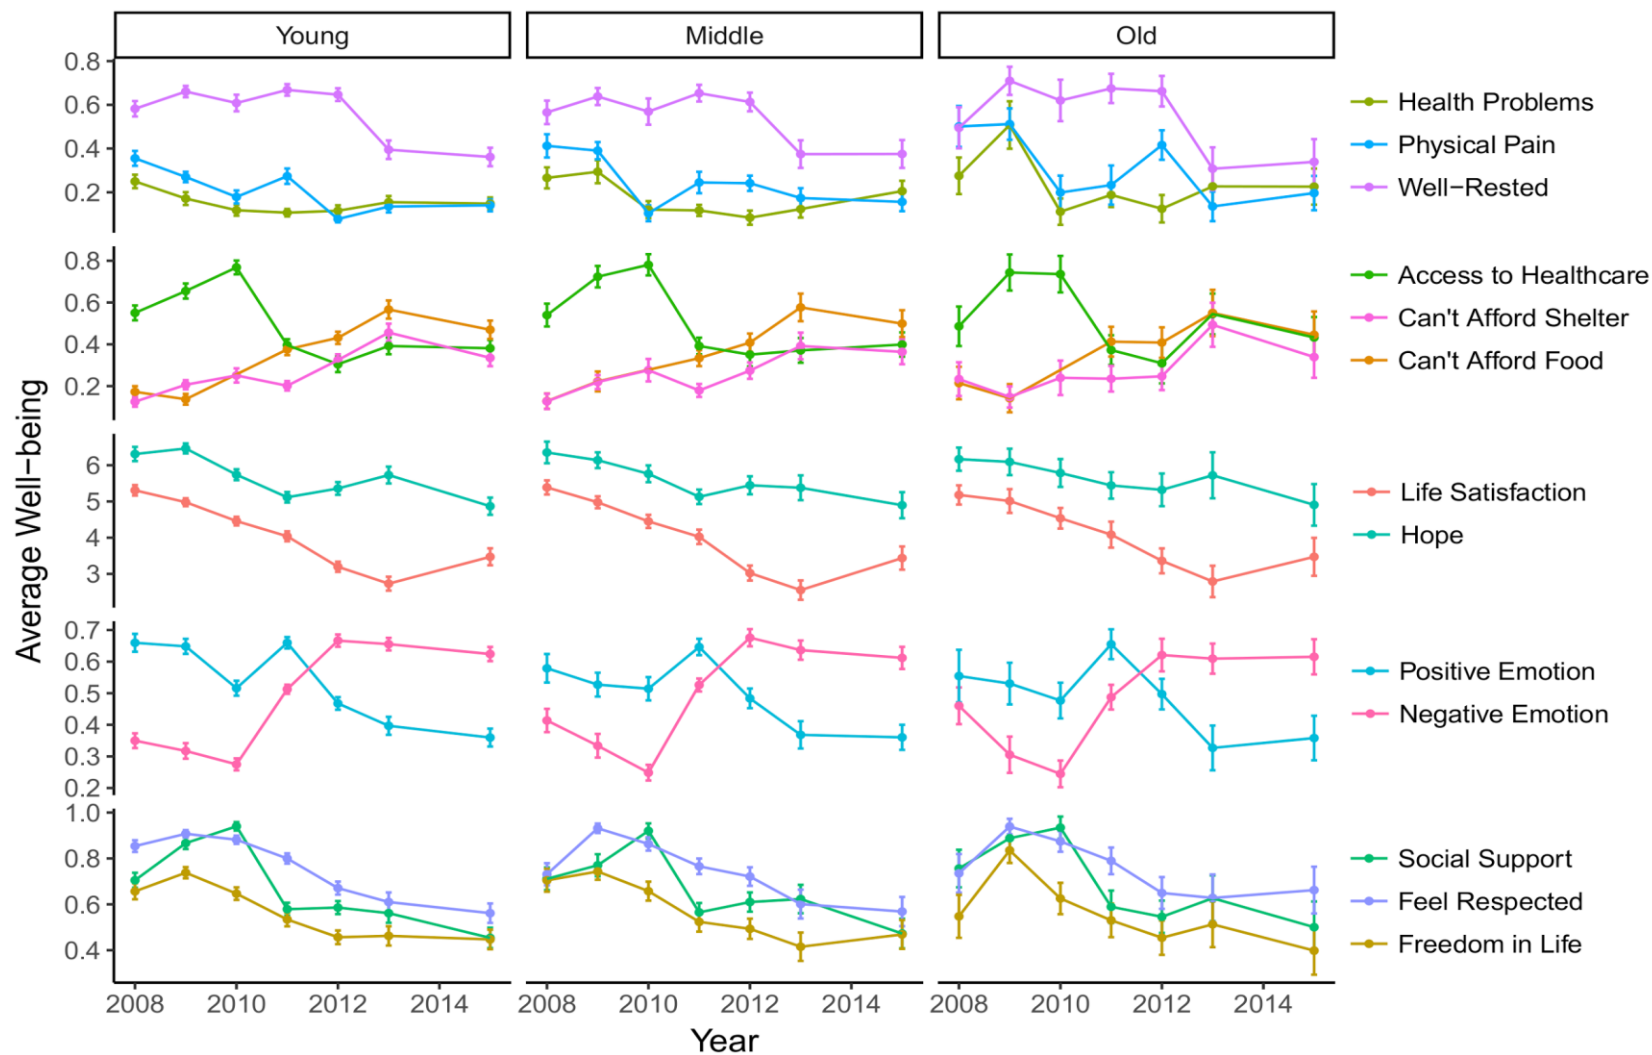

**Supplementary Figure 2. Age-specific trends in well-being in Syria from 2008 to 2015.** Younger adults, mid-life adults, and older adults refer to participants aged 35 or younger, participants aged 36-55, and participants 56 or older, respectively. Error bars indicate 95% CI ( $\pm 1.96 \times$  standard error). Source data are provided as a Source Data file.

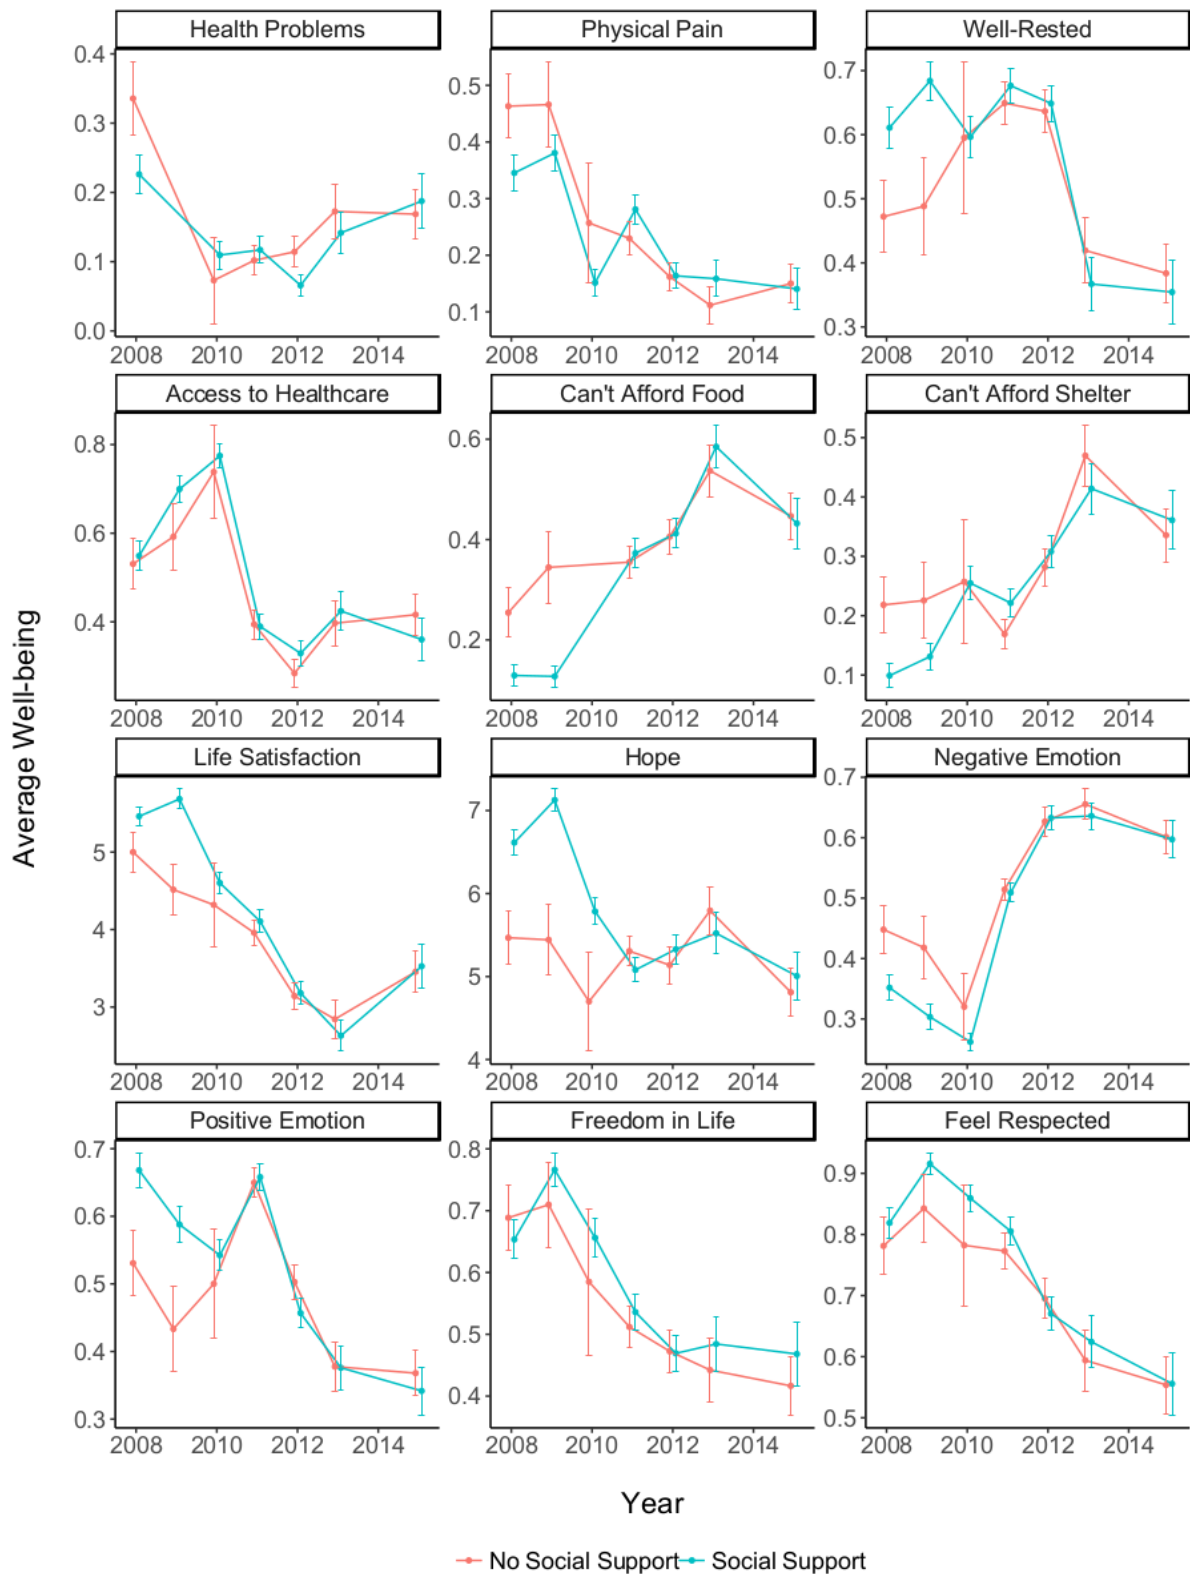

**Supplementary Figure 3. Temporal changes in well-being from 2008 to 2015 by availability of social support.** Error bars indicate 95% CI ( $\pm 1.96 \times$  standard error). Source data are provided as a Source Data file.

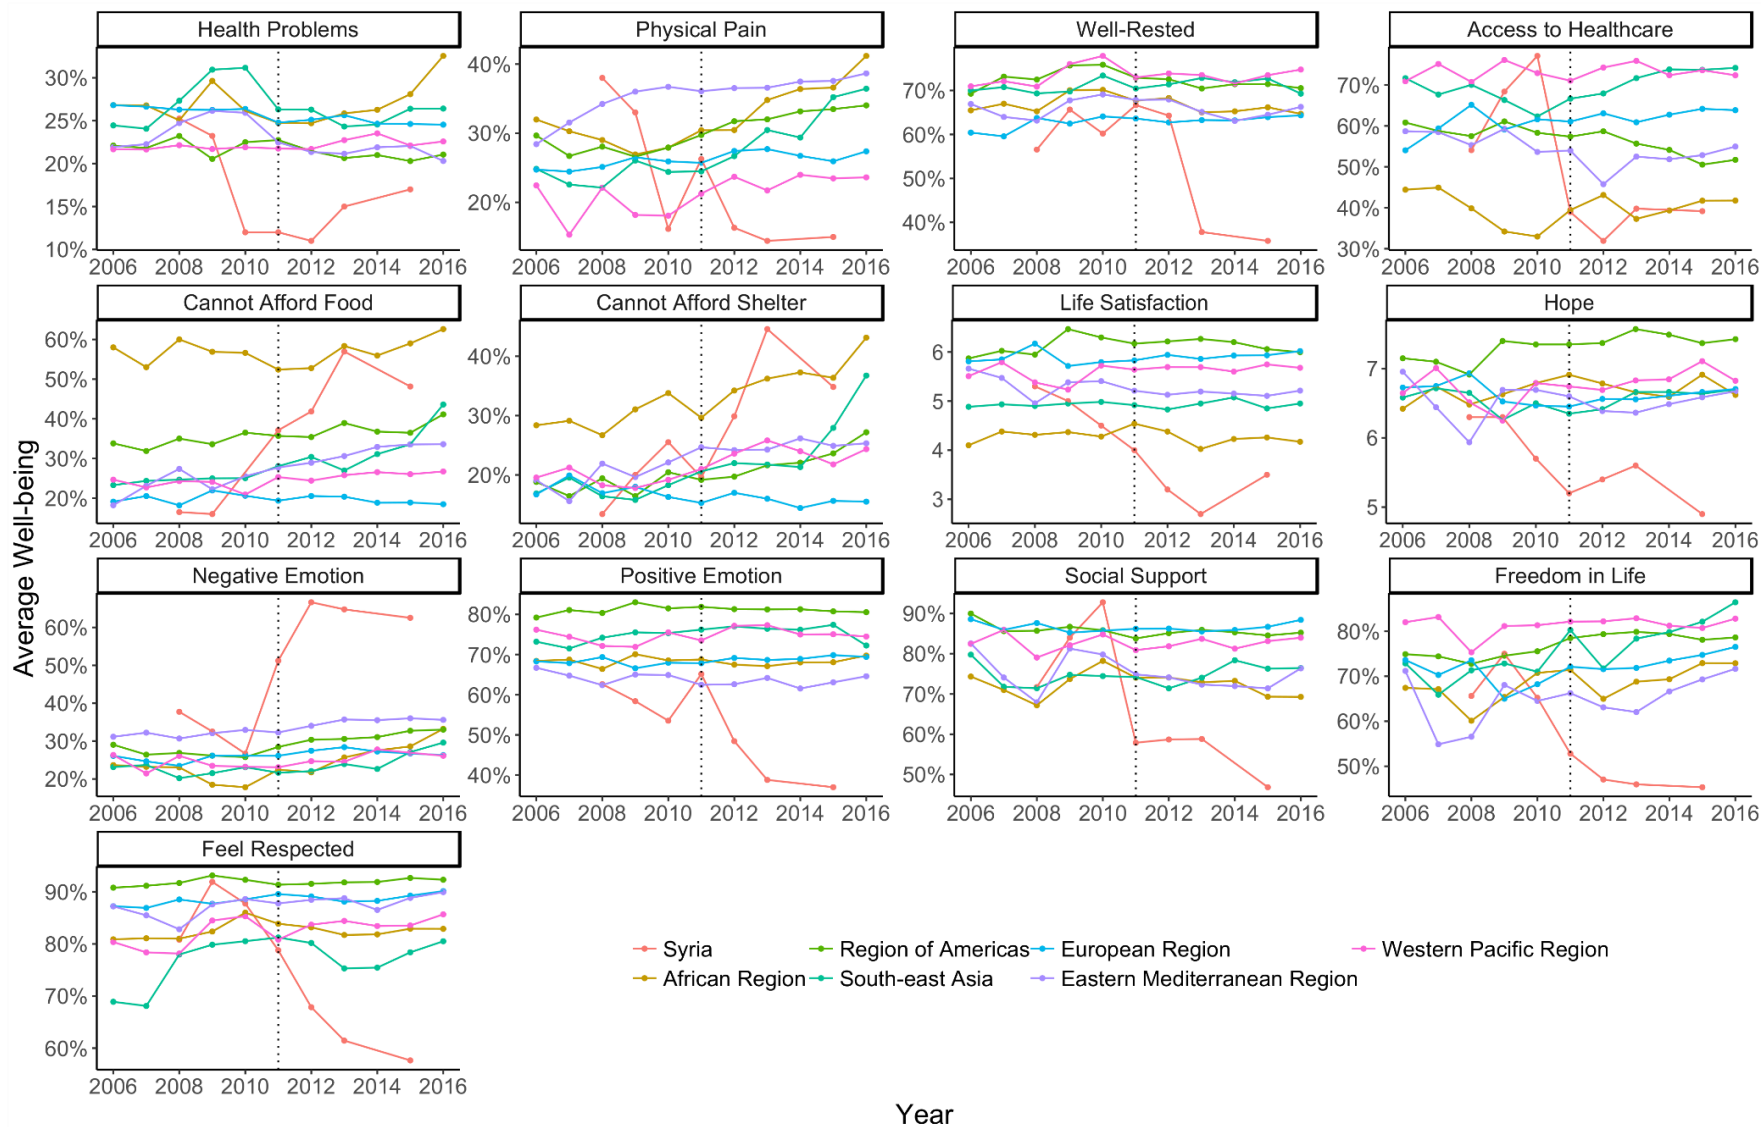

**Supplementary Figure 4. The longitudinal trends in physical, mental, and social well-being for Syria and 6 WHO regions from 2006 to 2016.** Source data are provided as a Source Data file.

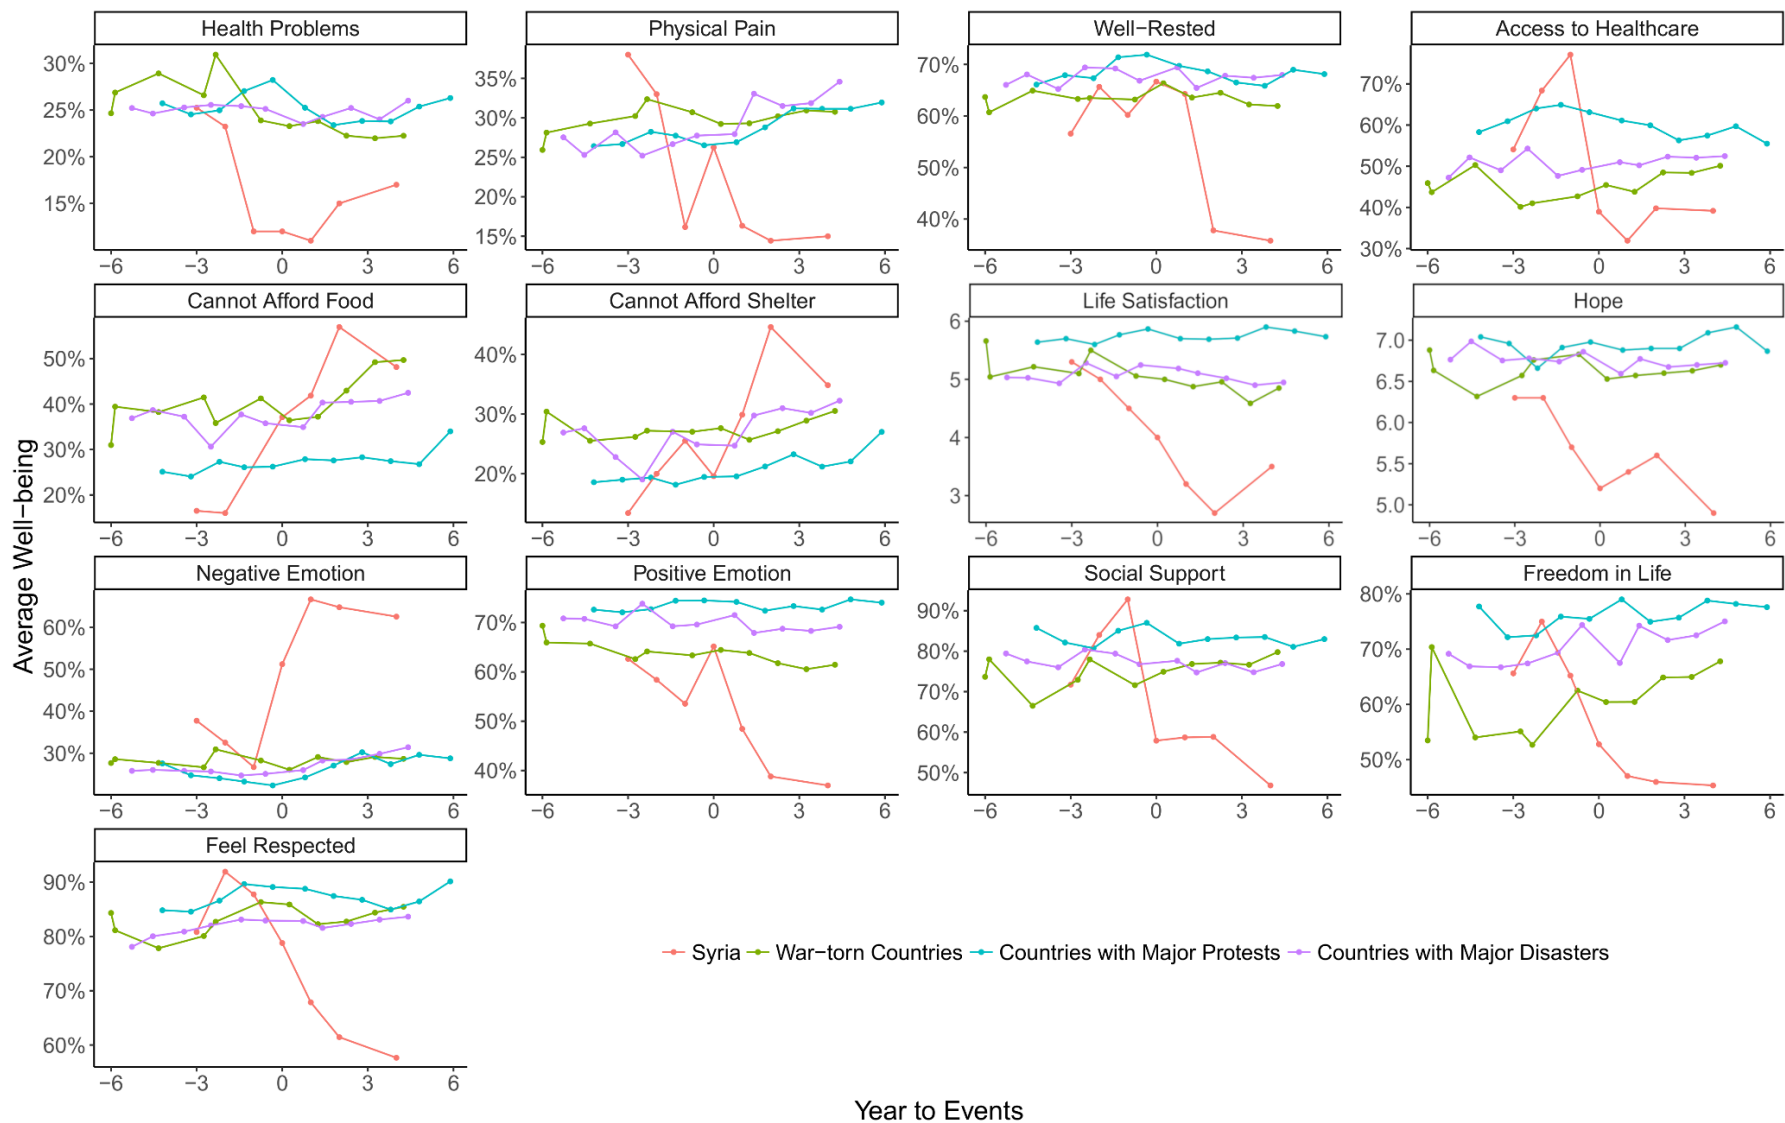

**Supplementary Figure 5. The longitudinal trends in well-being for Syria and countries that experienced war, protests, and disasters.** Source data are provided as a Source Data file.

**Supplementary Table 1.** Estimates and 95% confidence intervals from multilevel modeling of temporal changes in well-being in Syria.

|                                                                                   | Problems            | Pain                | Rested              | Health Care         | Cannot Afford Food  | Cannot Afford Shelter | Life Sat.           | Hope                | Pos. Emot.          | Neg. Emot.        | Support             | Respect             | Freedom             |
|-----------------------------------------------------------------------------------|---------------------|---------------------|---------------------|---------------------|---------------------|-----------------------|---------------------|---------------------|---------------------|-------------------|---------------------|---------------------|---------------------|
| <b><u>Overall Trends in Well-being</u></b>                                        |                     |                     |                     |                     |                     |                       |                     |                     |                     |                   |                     |                     |                     |
| N                                                                                 | 8330                | 9319                | 9684                | 8039                | 7650                | 9783                  | 11300               | 10263               | 8991                | 11393             | 8751                | 10726               | 10368               |
| Intercept                                                                         | -1.354              | -0.615              | 0.773               | 0.520               | -1.527              | -1.670                | 5.152               | 6.222               | 0.648               | 0.299             | 1.380               | 0.914               | 2.186               |
|                                                                                   | [-1.508;<br>-1.200] | [-0.734;<br>-0.495] | [0.669;<br>0.877]   | [0.381;<br>0.659]   | [-1.658;<br>-1.396] | [-1.807;<br>-1.533]   | [5.055;<br>5.248]   | [6.111;<br>6.333]   | [0.632;<br>0.664]   | [0.281;<br>0.318] | [1.278;<br>1.483]   | [0.824;<br>1.003]   | [2.044;<br>2.327]   |
| Year                                                                              | -0.658              | -1.475              | -0.978              | -1.283              | 1.908               | 1.238                 | -2.631              | -1.456              | -0.277              | 0.414             | -1.625              | -1.460              | -2.098              |
|                                                                                   | [-0.859;<br>-0.456] | [-1.651;<br>-1.300] | [-1.124;<br>-0.831] | [-1.436;<br>-1.131] | [1.735;<br>2.081]   | [1.077;<br>1.398]     | [-2.789;<br>-2.473] | [-1.646;<br>-1.267] | [-0.304;<br>-0.251] | [0.393;<br>0.435] | [-1.790;<br>-1.461] | [-1.607;<br>-1.313] | [-2.269;<br>-1.928] |
| <b><u>Estimates of Well-being based on the results from multilevel models</u></b> |                     |                     |                     |                     |                     |                       |                     |                     |                     |                   |                     |                     |                     |
| 2008                                                                              | 20.5%               | 35.1%               | 68.4%               | 62.7%               | 17.8%               | 15.8%                 | 5.15                | 6.22                | 64.8%               | 29.9%             | 79.9%               | 71.4%               | 89.9%               |
| 95% CI lower bound                                                                | 18.1%               | 32.4%               | 66.1%               | 59.4%               | 16.0%               | 14.1%                 | 5.06                | 6.11                | 63.2%               | 28.1%             | 78.2%               | 69.5%               | 88.5%               |
| 95% CI upper bound                                                                | 23.1%               | 37.9%               | 70.6%               | 65.9%               | 19.8%               | 17.8%                 | 5.25                | 6.33                | 66.4%               | 31.8%             | 81.5%               | 73.2%               | 91.1%               |
| 2015                                                                              | 11.8%               | 11.0%               | 44.9%               | 31.8%               | 59.4%               | 39.4%                 | 2.52                | 4.77                | 37.1%               | 71.3%             | 43.9%               | 36.7%               | 52.2%               |
| 95% CI lower bound                                                                | 9.9%                | 9.4%                | 41.3%               | 28.6%               | 55.2%               | 35.6%                 | 2.36                | 4.58                | 34.4%               | 69.2%             | 39.9%               | 33.3%               | 47.9%               |
| 95% CI upper bound                                                                | 14.1%               | 12.8%               | 48.6%               | 35.2%               | 63.5%               | 43.2%                 | 2.68                | 4.96                | 39.7%               | 73.4%             | 48.0%               | 40.2%               | 56.4%               |

**Supplementary Table 2.** Estimates and 95% confidence intervals from multilevel modeling of the demographic differences in temporal changes in well-being in Syria.

|                                                        | Problems         | Pain             | Rested           | Health Care      | Cannot Afford Food | Cannot Afford Shelter | Life Sat.        | Hope             | Pos. Emot.       | Neg. Emot.      | Support          | Respect          | Freedom          |
|--------------------------------------------------------|------------------|------------------|------------------|------------------|--------------------|-----------------------|------------------|------------------|------------------|-----------------|------------------|------------------|------------------|
| <b>Demographic Differences in Trends in Well-being</b> |                  |                  |                  |                  |                    |                       |                  |                  |                  |                 |                  |                  |                  |
| N                                                      | 8326             | 9314             | 9679             | 8036             | 7648               | 9778                  | 11295            | 10258            | 8988             | 11388           | 8748             | 10721            | 10363            |
| Intercept                                              | -1.434           | -0.707           | 0.742            | 0.566            | -1.362             | -1.590                | 4.983            | 6.033            | 0.654            | 0.295           | 1.273            | 0.989            | 2.324            |
|                                                        | [-1.618; -1.250] | [-0.855; -0.558] | [0.615; 0.868]   | [0.405; 0.726]   | [-1.522; -1.202]   | [-1.749; -1.431]      | [4.860; 5.105]   | [5.890; 6.176]   | [0.633; 0.674]   | [0.273; 0.316]  | [1.138; 1.408]   | [0.875; 1.103]   | [2.153; 2.495]   |
| Year                                                   | -0.450           | -1.335           | -0.913           | -1.424           | 1.756              | 1.093                 | -2.362           | -1.292           | -0.275           | 0.415           | -1.481           | -1.440           | -2.351           |
|                                                        | [-0.730; -0.171] | [-1.582; -1.089] | [-1.119; -0.706] | [-1.639; -1.209] | [1.518; 1.994]     | [0.870; 1.316]        | [-2.583; -2.141] | [-1.555; -1.029] | [-0.312; -0.238] | [0.385; 0.445]  | [-1.708; -1.254] | [-1.645; -1.234] | [-2.594; -2.107] |
| Sex                                                    | 0.175            | 0.216            | 0.073            | -0.098           | -0.345             | -0.158                | 0.343            | 0.384            | -0.017           | 0.010           | 0.236            | -0.146           | -0.286           |
|                                                        | [-0.023; 0.374]  | [0.060; 0.373]   | [-0.073; 0.218]  | [-0.256; 0.059]  | [-0.543; -0.146]   | [-0.331; 0.015]       | [0.189; 0.498]   | [0.195; 0.573]   | [-0.043; 0.009]  | [-0.011; 0.032] | [0.056; 0.417]   | [-0.291; -0.001] | [-0.472; -0.100] |
| Age                                                    | 0.115            | 0.146            | 0.043            | -0.033           | 0.096              | 0.036                 | 0.014            | -0.004           | -0.023           | 0.011           | 0.072            | 0.016            | -0.054           |
|                                                        | [0.022; 0.208]   | [0.072; 0.220]   | [-0.027; 0.113]  | [-0.110; 0.043]  | [0.003; 0.189]     | [-0.044; 0.117]       | [-0.060; 0.089]  | [-0.094; 0.086]  | [-0.036; -0.011] | [0.001; 0.022]  | [-0.014; 0.157]  | [-0.053; 0.086]  | [-0.144; 0.036]  |
| Year X Sex                                             | -0.460           | -0.399           | -0.144           | 0.297            | 0.327              | 0.282                 | -0.554           | -0.328           | 0.003            | -0.006          | -0.320           | -0.054           | 0.532            |
|                                                        | [-0.865; -0.055] | [-0.753; -0.044] | [-0.437; 0.149]  | [-0.008; 0.601]  | [-0.022; 0.676]    | [-0.040; 0.604]       | [-0.869; -0.239] | [-0.706; 0.049]  | [-0.049; 0.056]  | [-0.048; 0.037] | [-0.651; 0.012]  | [-0.349; 0.241]  | [0.190; 0.873]   |
| Year X Age                                             | -0.039           | 0.113            | -0.143           | 0.085            | -0.188             | -0.010                | -0.048           | -0.036           | 0.035            | -0.019          | -0.024           | -0.028           | 0.131            |
|                                                        | [-0.219; 0.141]  | [-0.040; 0.265]  | [-0.282; -0.005] | [-0.058; 0.228]  | [-0.350; -0.026]   | [-0.157; 0.138]       | [-0.196; 0.100]  | [-0.212; 0.140]  | [0.010; 0.059]   | [-0.039; 0.001] | [-0.177; 0.129]  | [-0.165; 0.109]  | [-0.032; 0.293]  |
| Sex X Age                                              | -0.031           | 0.013            | -0.080           | 0.083            | -0.149             | -0.024                | -0.031           | -0.108           | -0.004           | -0.000          | -0.075           | 0.035            | -0.051           |
|                                                        | [-0.164; 0.103]  | [-0.093; 0.119]  | [-0.181; 0.020]  | [-0.025; 0.192]  | [-0.287; -0.010]   | [-0.142; 0.095]       | [-0.137; 0.076]  | [-0.237; 0.022]  | [-0.022; 0.014]  | [-0.015; 0.015] | [-0.199; 0.049]  | [-0.066; 0.135]  | [-0.176; 0.074]  |
| Year X Sex X Age                                       | 0.100            | -0.104           | 0.228            | -0.103           | 0.274              | -0.092                | 0.011            | 0.259            | 0.006            | -0.005          | -0.013           | -0.039           | 0.072            |
|                                                        | [-0.162; 0.361]  | [-0.327; 0.119]  | [0.031; 0.425]   | [-0.307; 0.101]  | [0.034; 0.513]     | [-0.309; 0.124]       | [-0.201; 0.223]  | [0.006; 0.512]   | [-0.029; 0.041]  | [-0.034; 0.024] | [-0.236; 0.210]  | [-0.237; 0.159]  | [-0.155; 0.300]  |



**Supplementary Table 3.** Estimated changes in physical well-being in 13 Syrian governorates based on the random effects from multilevel models.

|                                            | Health Problems |               | Pain    |               | Rested  |               | Health Care |               | Cannot Afford Food |             | Cannot Afford Shelter |             |
|--------------------------------------------|-----------------|---------------|---------|---------------|---------|---------------|-------------|---------------|--------------------|-------------|-----------------------|-------------|
| Likelihood Ratio Test ( $\chi^2$ , df = 2) | 32.1            |               | 24.5    |               | 33.7    |               | 74.1        |               | 10.9               |             | 35.6                  |             |
| p-value                                    | <0.0001         |               | <0.0001 |               | <0.0001 |               | <0.0001     |               | 0.0043             |             | <0.0001               |             |
|                                            | OR              | 95% CI        | OR      | 95% CI        | OR      | 95% CI        | OR          | 95% CI        | OR                 | 95% CI      | OR                    | 95% CI      |
| Damascus                                   | 0.379           | [0.339,0.423] | 0.218   | [0.192,0.246] | 0.197   | [0.178,0.219] | 0.666       | [0.593,0.748] | 4.188              | [4.0,4.39]  | 1.778                 | [1.63,1.94] |
| Rural Damascus                             | 0.508           | [0.453,0.570] | 0.265   | [0.241,0.291] | 0.204   | [0.188,0.221] | 0.064       | [0.057,0.072] | 7.595              | [7.35,7.85] | 3.662                 | [3.39,3.96] |
| Sweida                                     | 0.053           | [0.038,0.073] | 0.029   | [0.020,0.043] | 0.420   | [0.317,0.556] | 0.491       | [0.329,0.735] | 7.711              | [6.77,8.78] | 10.269                | [7.01,15.1] |
| Daraa                                      | 0.324           | [0.251,0.418] | 0.400   | [0.318,0.503] | 0.316   | [0.266,0.375] | 0.120       | [0.093,0.154] | 6.886              | [6.30,7.52] | 2.374                 | [2.04,2.76] |
| Homs                                       | 0.310           | [0.283,0.338] | 0.243   | [0.218,0.271] | 0.530   | [0.484,0.580] | 0.204       | [0.178,0.234] | 7.439              | [7.11,7.78] | 5.382                 | [4.86,5.96] |
| Hama                                       | 1.125           | [0.934,1.36]  | 0.113   | [0.099,0.129] | 0.718   | [0.645,0.799] | 0.152       | [0.131,0.177] | 14.905             | [14.,15.9]  | 9.045                 | [7.87,10.4] |
| Tartus                                     | 0.453           | [0.376,0.545] | 0.119   | [0.100,0.140] | 0.975   | [0.847,1.12]  | 1.327       | [1.08,1.64]   | 10.338             | [9.48,11.3] | 6.924                 | [5.67,8.46] |
| Latakia                                    | 0.295           | [0.251,0.348] | 0.353   | [0.296,0.421] | 0.311   | [0.269,0.359] | 0.758       | [0.630,0.910] | 5.839              | [5.46,6.25] | 8.536                 | [7.11,10.3] |
| Aleppo                                     | 0.464           | [0.445,0.483] | 0.220   | [0.210,0.231] | 0.531   | [0.512,0.552] | 0.317       | [0.303,0.331] | 5.824              | [5.73,5.92] | 3.611                 | [3.47,3.76] |
| Idlib                                      | 1.439           | [1.18,1.76]   | 0.246   | [0.214,0.284] | 0.286   | [0.256,0.321] | 0.209       | [0.177,0.247] | 4.995              | [4.75,5.25] | 2.566                 | [2.30,2.86] |
| Deir ez-zor                                | 0.732           | [0.608,0.880] | 0.190   | [0.163,0.222] | 0.413   | [0.364,0.469] | 0.319       | [0.267,0.380] | 6.979              | [6.56,7.42] | 2.078                 | [1.86,2.33] |
| Al- Hasakah                                | 0.978           | [0.764,1.25]  | 0.490   | [0.403,0.595] | 0.270   | [0.234,0.312] | 0.202       | [0.165,0.246] | 4.755              | [4.48,5.05] | 1.335                 | [1.19,1.50] |
| Ar-Raqqah                                  | 1.768           | [1.22,2.56]   | 0.541   | [0.414,0.706] | 0.128   | [0.105,0.157] | 0.693       | [0.548,0.876] | 7.855              | [7.16,8.61] | 4.120                 | [3.40,4.99] |

**Supplementary Table 4.** Estimated changes in mental and social well-being in 13 Syrian governorates based on the random effects from multilevel models.

|                                            | Life Satisfaction |               | Hope     |                 | Pos. Emot. |                 | Neg. Emot. |               | Support   |               | Respect   |               | Freedom   |               |
|--------------------------------------------|-------------------|---------------|----------|-----------------|------------|-----------------|------------|---------------|-----------|---------------|-----------|---------------|-----------|---------------|
| Likelihood Ratio Test ( $\chi^2$ , df = 2) | 9.2               |               | 38.1     |                 | 8.6        |                 | 36.2       |               | 14.6      |               | 42.1      |               | 12.7      |               |
| p-value                                    | 0.0102            |               | <0.0001  |                 | 0.0135     |                 | <0.0001    |               | 0.0007    |               | <0.0001   |               | 0.002     |               |
|                                            | <b>b</b>          | <b>95% CI</b> | <b>b</b> | <b>95% CI</b>   | <b>b</b>   | <b>95% CI</b>   | <b>b</b>   | <b>95% CI</b> | <b>OR</b> | <b>95% CI</b> | <b>OR</b> | <b>95% CI</b> | <b>OR</b> | <b>95% CI</b> |
| Damascus                                   | -2.442            | [-2.75,-2.69] | -1.497   | [-1.66,-1.34]   | -0.257     | [-0.258,-0.255] | 0.446      | [0.445,0.448] | 0.125     | [0.110,0.142] | 0.129     | [0.114,0.146] | 0.334     | [0.317,0.351] |
| Rural Damascus                             | -2.085            | [-2.40,-2.35] | -1.317   | [-1.45,-1.18]   | -0.307     | [-0.308,-0.306] | 0.458      | [0.456,0.459] | 0.110     | [0.100,0.122] | 0.056     | [0.050,0.062] | 0.295     | [0.284,0.308] |
| Sweida                                     | -2.372            | [-2.77,-2.59] | -1.388   | [-1.97,-0.809]  | -0.281     | [-0.285,-0.277] | 0.346      | [0.342,0.351] | 0.381     | [0.286,0.507] | 0.083     | [0.055,0.125] | 0.206     | [0.180,0.235] |
| Daraa                                      | -2.479            | [-2.89,-2.78] | -0.550   | [-0.841,-0.259] | -0.275     | [-0.278,-0.272] | 0.472      | [0.469,0.475] | 0.190     | [0.155,0.233] | 0.126     | [0.102,0.156] | 0.222     | [0.204,0.243] |
| Homs                                       | -1.904            | [-2.21,-2.10] | -1.572   | [-1.76,-1.38]   | -0.293     | [-0.295,-0.292] | 0.347      | [0.345,0.348] | 0.261     | [0.233,0.292] | 0.090     | [0.079,0.102] | 0.300     | [0.286,0.314] |
| Hama                                       | -2.127            | [-2.48,-2.41] | 0.042    | [-0.149,0.234]  | -0.216     | [-0.218,-0.214] | 0.408      | [0.406,0.410] | 0.162     | [0.141,0.186] | 0.077     | [0.066,0.091] | 0.148     | [0.139,0.158] |
| Tartus                                     | -2.075            | [-2.47,-2.34] | -1.314   | [-1.60,-1.03]   | -0.178     | [-0.180,-0.175] | 0.363      | [0.361,0.366] | 0.238     | [0.200,0.283] | 0.791     | [0.692,0.904] | 0.315     | [0.291,0.340] |
| Latakia                                    | -2.324            | [-2.66,-2.56] | -1.084   | [-1.34,-0.829]  | -0.356     | [-0.359,-0.354] | 0.418      | [0.415,0.420] | 0.324     | [0.274,0.382] | 0.215     | [0.182,0.254] | 0.146     | [0.134,0.158] |
| Aleppo                                     | -2.614            | [-2.79,-2.76] | -2.222   | [-2.29,-2.16]   | -0.259     | [-0.260,-0.258] | 0.333      | [0.332,0.334] | 0.166     | [0.158,0.175] | 0.163     | [0.156,0.171] | 0.177     | [0.173,0.181] |
| Idlib                                      | -2.438            | [-2.72,-2.63] | -1.775   | [-1.99,-1.56]   | -0.298     | [-0.299,-0.296] | 0.489      | [0.487,0.491] | 0.259     | [0.225,0.298] | 0.148     | [0.130,0.170] | 0.166     | [0.156,0.178] |
| Deir ez-zor                                | -2.650            | [-3.06,-2.96] | -2.075   | [-2.35,-1.80]   | -0.281     | [-0.283,-0.279] | 0.448      | [0.446,0.451] | 0.600     | [0.517,0.697] | 0.056     | [0.046,0.067] | 0.258     | [0.241,0.276] |
| Al- Hasakah                                | -2.284            | [-2.64,-2.56] | -1.192   | [-1.46,-0.923]  | -0.367     | [-0.369,-0.364] | 0.521      | [0.519,0.523] | 0.261     | [0.221,0.307] | 0.069     | [0.057,0.082] | 0.299     | [0.279,0.321] |
| Ar-Raqqah                                  | -2.505            | [-2.94,-2.83] | -0.195   | [-0.552,0.163]  | -0.297     | [-0.300,-0.294] | 0.568      | [0.564,0.571] | 0.128     | [0.102,0.162] | 0.139     | [0.111,0.175] | 0.307     | [0.279,0.337] |

**Supplementary Table 5.** Odd ratios and 95% confidence intervals comparing the levels of well-being of participants who were exposed and not exposed to the Syria conflict.

|                                                                       | Problems       | Pain           | Rested         | Health Care    | Cannot Afford Food | Cannot Afford Shelter | Life Sat.       | Hope             | Pos. Emot.      | Neg. Emot.      | Support        | Respect        | Freedom        |
|-----------------------------------------------------------------------|----------------|----------------|----------------|----------------|--------------------|-----------------------|-----------------|------------------|-----------------|-----------------|----------------|----------------|----------------|
| <b>Exposed vs Not Exposed (Reference Group) to the Syria Conflict</b> |                |                |                |                |                    |                       |                 |                  |                 |                 |                |                |                |
| OR/b                                                                  | 1.038          | 0.986          | 1.030          | 1.074          | 1.362              | 1.235                 | -0.170          | -0.327           | 0.002           | 0.013           | 0.999          | 0.820          | 1.078          |
| 95% CI                                                                | [0.817, 1.319] | [0.766, 1.271] | [0.835, 1.270] | [0.885, 1.303] | [1.108, 1.674]     | [1.012, 1.508]        | [-0.404, 0.064] | [-0.597, -0.057] | [-0.029, 0.034] | [-0.011, 0.037] | [0.815, 1.225] | [0.672, 1.002] | [0.889, 1.307] |

**Supplementary Table 6.** Estimates and 95% confidence intervals from multiple imputations of multilevel modeling testing the differences in well-being by exposure to the Syria conflict.

|                  | Problems                   | Pain                       | Rested                     | Health Care                | Cannot Afford Food        | Cannot Afford Shelter      | Life Sat.                 | Hope                       | Pos. Emot.                 | Neg. Emot.                 | Support                    | Respect                   | Freedom                    |
|------------------|----------------------------|----------------------------|----------------------------|----------------------------|---------------------------|----------------------------|---------------------------|----------------------------|----------------------------|----------------------------|----------------------------|---------------------------|----------------------------|
| Intercept        | -1.775<br>[-2.038, -1.511] | -1.777<br>[-2.101, -1.453] | -0.501<br>[-0.742, -0.260] | -0.475<br>[-0.819, -0.132] | 0.050<br>[-0.170, 0.270]  | -0.518<br>[-0.749, -0.288] | 2.751<br>[2.497, 3.005]   | 5.709<br>[5.365, 6.053]    | 0.404<br>[0.371, 0.438]    | 0.653<br>[0.627, 0.678]    | 0.292<br>[0.053, 0.532]    | 0.459<br>[0.241, 0.677]   | -0.211<br>[-0.427, 0.006]  |
| Year             | 0.245<br>[-0.092, 0.583]   | 0.173<br>[-0.177, 0.524]   | -0.088<br>[-0.386, 0.210]  | -0.174<br>[-0.449, 0.100]  | -0.199<br>[-0.475, 0.076] | -0.248<br>[-0.529, 0.034]  | 0.837<br>[0.510, 1.165]   | -0.818<br>[-1.201, -0.436] | -0.030<br>[-0.074, 0.015]  | -0.056<br>[-0.089, -0.023] | -0.569<br>[-0.843, -0.294] | -0.105<br>[-0.384, 0.173] | 0.193<br>[-0.073, 0.459]   |
| Sex              | 0.057<br>[-0.289, 0.404]   | -0.016<br>[-0.374, 0.342]  | 0.014<br>[-0.270, 0.297]   | 0.086<br>[-0.184, 0.357]   | 0.114<br>[-0.166, 0.394]  | 0.418<br>[0.140, 0.695]    | 0.023<br>[-0.302, 0.347]  | 0.164<br>[-0.214, 0.542]   | -0.047<br>[-0.091, -0.003] | -0.025<br>[-0.058, 0.008]  | 0.075<br>[-0.199, 0.350]   | 0.163<br>[-0.113, 0.440]  | -0.026<br>[-0.298, 0.246]  |
| Age              | -0.083<br>[-0.242, 0.077]  | 0.058<br>[-0.089, 0.206]   | -0.055<br>[-0.182, 0.073]  | 0.010<br>[-0.103, 0.123]   | -0.041<br>[-0.159, 0.077] | 0.055<br>[-0.062, 0.173]   | -0.072<br>[-0.210, 0.067] | 0.010<br>[-0.157, 0.177]   | -0.010<br>[-0.030, 0.009]  | 0.000<br>[-0.014, 0.015]   | 0.060<br>[-0.058, 0.177]   | 0.017<br>[-0.102, 0.135]  | -0.003<br>[-0.116, 0.110]  |
| Exposure         | 0.037<br>[-0.203, 0.277]   | -0.014<br>[-0.267, 0.240]  | 0.029<br>[-0.180, 0.239]   | 0.071<br>[-0.122, 0.264]   | 0.309<br>[0.103, 0.515]   | 0.211<br>[0.012, 0.411]    | -0.170<br>[-0.404, 0.064] | -0.327<br>[-0.597, -0.057] | 0.002<br>[-0.029, 0.034]   | 0.013<br>[-0.011, 0.037]   | -0.001<br>[-0.205, 0.203]  | -0.198<br>[-0.398, 0.002] | 0.075<br>[-0.118, 0.268]   |
| Year X Sex       | -0.243<br>[-0.727, 0.240]  | -0.410<br>[-0.920, 0.100]  | 0.061<br>[-0.343, 0.466]   | 0.284<br>[-0.099, 0.666]   | -0.317<br>[-0.704, 0.070] | -0.504<br>[-0.896, -0.111] | -0.092<br>[-0.555, 0.371] | 0.242<br>[-0.294, 0.779]   | 0.015<br>[-0.047, 0.078]   | 0.037<br>[-0.010, 0.085]   | 0.086<br>[-0.300, 0.473]   | -0.040<br>[-0.429, 0.349] | -0.489<br>[-0.872, -0.106] |
| Year X Age       | 0.303<br>[0.093, 0.513]    | 0.121<br>[-0.084, 0.325]   | 0.030<br>[-0.155, 0.216]   | 0.030<br>[-0.137, 0.196]   | -0.035<br>[-0.214, 0.145] | 0.001<br>[-0.168, 0.170]   | 0.071<br>[-0.135, 0.277]  | -0.125<br>[-0.361, 0.110]  | 0.011<br>[-0.017, 0.039]   | 0.003<br>[-0.018, 0.024]   | 0.051<br>[-0.120, 0.222]   | 0.068<br>[-0.107, 0.243]  | -0.061<br>[-0.225, 0.103]  |
| Sex X Age        | 0.271<br>[0.059, 0.482]    | -0.056<br>[-0.283, 0.172]  | 0.013<br>[-0.171, 0.198]   | 0.132<br>[-0.033, 0.297]   | 0.009<br>[-0.166, 0.184]  | -0.107<br>[-0.272, 0.059]  | 0.059<br>[-0.142, 0.260]  | -0.050<br>[-0.286, 0.186]  | -0.014<br>[-0.042, 0.013]  | -0.008<br>[-0.029, 0.012]  | 0.012<br>[-0.159, 0.184]   | -0.022<br>[-0.196, 0.152] | 0.039<br>[-0.125, 0.203]   |
| Year X Sex X Age | -0.384<br>[-0.680, -0.088] | -0.175<br>[-0.504, 0.153]  | 0.045<br>[-0.214, 0.305]   | -0.119<br>[-0.359, 0.121]  | 0.122<br>[-0.136, 0.380]  | -0.025<br>[-0.271, 0.220]  | -0.137<br>[-0.434, 0.161] | 0.285<br>[-0.058, 0.627]   | 0.023<br>[-0.017, 0.063]   | -0.001<br>[-0.031, 0.029]  | -0.168<br>[-0.424, 0.089]  | 0.033<br>[-0.223, 0.289]  | 0.038<br>[-0.205, 0.281]   |

**Supplementary Table 7.** Estimates and 95% confidence intervals from multilevel modeling testing the differences in well-being by exposure to the Syria conflict.

|                                                                 | Problems                      | Pain                          | Rested                        | Health Care                   | Cannot Afford Food            | Cannot Afford Shelter         | Life Sat.                    | Hope                          | Pos. Emot.                    | Neg. Emot.                    | Support                       | Respect                       | Freedom                       |
|-----------------------------------------------------------------|-------------------------------|-------------------------------|-------------------------------|-------------------------------|-------------------------------|-------------------------------|------------------------------|-------------------------------|-------------------------------|-------------------------------|-------------------------------|-------------------------------|-------------------------------|
| <b>Differences in Well-being by Exposure Status (2013-2015)</b> |                               |                               |                               |                               |                               |                               |                              |                               |                               |                               |                               |                               |                               |
| N                                                               | 2024                          | 1995                          | 1657                          | 1913                          | 1626                          | 1742                          | 1951                         | 1846                          | 2024                          | 2024                          | 1673                          | 1747                          | 1707                          |
| Intercept                                                       | -1.775<br>[-2.038;<br>-1.511] | -1.773<br>[-2.096;<br>-1.451] | -0.508<br>[-0.742;<br>-0.275] | -0.474<br>[-0.817;<br>-0.130] | 0.058<br>[-0.152;<br>0.268]   | -0.579<br>[-0.809;<br>-0.349] | 2.751<br>[2.497;<br>3.004]   | 5.725<br>[5.385;<br>6.066]    | 0.404<br>[0.371;<br>0.438]    | 0.653<br>[0.627;<br>0.678]    | 0.299<br>[0.073;<br>0.525]    | 0.448<br>[0.237;<br>0.659]    | -0.216<br>[-0.423;<br>-0.008] |
| Year                                                            | 0.245<br>[-0.092;<br>0.583]   | 0.169<br>[-0.182;<br>0.520]   | -0.109<br>[-0.399;<br>0.181]  | -0.185<br>[-0.458;<br>0.087]  | -0.196<br>[-0.474;<br>0.081]  | -0.174<br>[-0.453;<br>0.105]  | 0.839<br>[0.513;<br>1.165]   | -0.828<br>[-1.201;<br>-0.456] | -0.030<br>[-0.074;<br>0.015]  | -0.056<br>[-0.089;<br>-0.023] | -0.573<br>[-0.849;<br>-0.296] | -0.099<br>[-0.372;<br>0.174]  | 0.239<br>[-0.028;<br>0.505]   |
| Sex                                                             | 0.057<br>[-0.289;<br>0.404]   | -0.007<br>[-0.364;<br>0.350]  | 0.010<br>[-0.271;<br>0.292]   | 0.069<br>[-0.200;<br>0.339]   | 0.168<br>[-0.113;<br>0.448]   | 0.475<br>[0.200;<br>0.750]    | 0.020<br>[-0.303;<br>0.343]  | 0.159<br>[-0.211;<br>0.530]   | -0.047<br>[-0.091;<br>-0.003] | -0.025<br>[-0.058;<br>0.008]  | 0.071<br>[-0.202;<br>0.344]   | 0.178<br>[-0.098;<br>0.454]   | 0.014<br>[-0.252;<br>0.279]   |
| Age                                                             | -0.083<br>[-0.242;<br>0.077]  | 0.059<br>[-0.089;<br>0.208]   | -0.067<br>[-0.193;<br>0.058]  | 0.007<br>[-0.107;<br>0.122]   | -0.038<br>[-0.159;<br>0.083]  | 0.070<br>[-0.050;<br>0.190]   | -0.073<br>[-0.212;<br>0.065] | 0.015<br>[-0.149;<br>0.178]   | -0.010<br>[-0.030;<br>0.009]  | 0.000<br>[-0.014;<br>0.015]   | 0.061<br>[-0.056;<br>0.179]   | 0.004<br>[-0.116;<br>0.123]   | 0.003<br>[-0.110;<br>0.115]   |
| Exposure                                                        | 0.037<br>[-0.203;<br>0.277]   | -0.010<br>[-0.263;<br>0.243]  | 0.030<br>[-0.173;<br>0.234]   | 0.080<br>[-0.111;<br>0.272]   | 0.327<br>[0.127;<br>0.526]    | 0.202<br>[0.005;<br>0.399]    | -0.176<br>[-0.408;<br>0.057] | -0.333<br>[-0.597;<br>-0.069] | 0.002<br>[-0.029;<br>0.034]   | 0.013<br>[-0.011;<br>0.037]   | -0.011<br>[-0.208;<br>0.186]  | -0.212<br>[-0.408;<br>-0.017] | 0.059<br>[-0.133;<br>0.251]   |
| Year X Sex                                                      | -0.243<br>[-0.727;<br>0.240]  | -0.418<br>[-0.928;<br>0.091]  | 0.090<br>[-0.314;<br>0.493]   | 0.306<br>[-0.074;<br>0.687]   | -0.409<br>[-0.804;<br>-0.013] | -0.568<br>[-0.960;<br>-0.176] | -0.094<br>[-0.555;<br>0.367] | 0.250<br>[-0.274;<br>0.774]   | 0.015<br>[-0.047;<br>0.078]   | 0.037<br>[-0.010;<br>0.085]   | 0.117<br>[-0.276;<br>0.510]   | -0.045<br>[-0.434;<br>0.344]  | -0.562<br>[-0.943;<br>-0.181] |
| Year X Age                                                      | 0.303<br>[0.093;<br>0.513]    | 0.120<br>[-0.085;<br>0.325]   | 0.047<br>[-0.135;<br>0.230]   | 0.034<br>[-0.134;<br>0.201]   | -0.066<br>[-0.242;<br>0.110]  | -0.004<br>[-0.176;<br>0.168]  | 0.073<br>[-0.131;<br>0.277]  | -0.141<br>[-0.374;<br>0.092]  | 0.011<br>[-0.017;<br>0.039]   | 0.003<br>[-0.018;<br>0.024]   | 0.062<br>[-0.109;<br>0.233]   | 0.078<br>[-0.096;<br>0.252]   | -0.071<br>[-0.236;<br>0.095]  |
| Sex X Age                                                       | 0.271<br>[0.059;<br>0.482]    | -0.059<br>[-0.281;<br>0.164]  | 0.022<br>[-0.158;<br>0.201]   | 0.145<br>[-0.021;<br>0.311]   | 0.003<br>[-0.173;<br>0.180]   | -0.127<br>[-0.296;<br>0.042]  | 0.066<br>[-0.134;<br>0.267]  | -0.059<br>[-0.291;<br>0.174]  | -0.014<br>[-0.042;<br>0.013]  | -0.008<br>[-0.029;<br>0.012]  | 0.016<br>[-0.157;<br>0.189]   | -0.031<br>[-0.205;<br>0.143]  | 0.033<br>[-0.129;<br>0.195]   |
| Year X Sex X Age                                                | -0.384<br>[-0.680;<br>-0.088] | -0.173<br>[-0.498;<br>0.152]  | 0.045<br>[-0.214;<br>0.304]   | -0.133<br>[-0.374;<br>0.107]  | 0.174<br>[-0.082;<br>0.430]   | -0.023<br>[-0.274;<br>0.228]  | -0.153<br>[-0.448;<br>0.142] | 0.302<br>[-0.032;<br>0.636]   | 0.023<br>[-0.017;<br>0.063]   | -0.001<br>[-0.031;<br>0.029]  | -0.216<br>[-0.468;<br>0.037]  | 0.049<br>[-0.203;<br>0.301]   | 0.046<br>[-0.196;<br>0.287]   |

**Supplementary Table 8.** Summary of the additive and multiplicative interaction terms testing social support as an effect modifier of temporal changes in well-being.

|                                                | Year    |           |              |                         |                      |              |
|------------------------------------------------|---------|-----------|--------------|-------------------------|----------------------|--------------|
|                                                | 2008    |           |              | 2015                    |                      |              |
|                                                | N       | OR        | 95%CI        | N                       | OR                   | 95%CI        |
| <u>Health Problems</u>                         |         |           |              |                         |                      |              |
| No Social Support                              | 81/300  | Reference |              | 71/429                  | 0.63                 | (0.42, 0.94) |
| Social Support                                 | 186/885 | 0.68      | (0.52, 0.88) | 69/368                  | 0.58                 | (0.36, 0.95) |
| Measure of interaction on additive scale       |         |           |              | RERI (95% CI) =         | 0.28 (-0.04, 0.59)   |              |
| Measure of interaction on multiplicative scale |         |           |              | Ratio of ORs (95% CI) = | 1.37 (0.88, 1.86)    |              |
| <u>Physical Pain</u>                           |         |           |              |                         |                      |              |
| No Social Support                              | 120/299 | Reference |              | 61/429                  | 0.17                 | (0.12, 0.24) |
| Social Support                                 | 289/884 | 0.69      | (0.56, 0.84) | 51/368                  | 0.19                 | (0.12, 0.28) |
| Measure of interaction on additive scale       |         |           |              | RERI (95% CI) =         | 0.33 (0.16, 0.49)    |              |
| Measure of interaction on multiplicative scale |         |           |              | Ratio of ORs (95% CI) = | 1.59 (1.17, 2.01)    |              |
| <u>Well-restedness</u>                         |         |           |              |                         |                      |              |
| No Social Support                              | 177/298 | Reference |              | 141/358                 | 0.65                 | (0.48, 0.88) |
| Social Support                                 | 568/874 | 1.46      | (1.22, 1.75) | 109/295                 | 0.57                 | (0.40, 0.80) |
| Measure of interaction on additive scale       |         |           |              | RERI (95% CI) =         | -0.54 (-0.90, -0.18) |              |
| Measure of interaction on multiplicative scale |         |           |              | Ratio of ORs (95% CI) = | 0.60 (0.26, 0.94)    |              |
| <u>Health Care</u>                             |         |           |              |                         |                      |              |
| No Social Support                              | 158/297 | Reference |              | 171/418                 | 0.43                 | (0.32, 0.58) |
| Social Support                                 | 520/869 | 1.82      | (1.52, 2.19) | 130/353                 | 0.40                 | (0.28, 0.56) |
| Measure of interaction on additive scale       |         |           |              | RERI (95% CI) =         | -0.86 (-1.24, -0.48) |              |
| Measure of interaction on multiplicative scale |         |           |              | Ratio of ORs (95% CI) = | 0.50 (0.15, 0.85)    |              |
| <u>Food</u>                                    |         |           |              |                         |                      |              |
| No Social Support                              | 60/294  | Reference |              | 162/346                 | 2.80                 | (2.03, 3.87) |
| Social Support                                 | 90/881  | 0.49      | (0.40, 0.61) | 135/298                 | 3.95                 | (2.70, 5.77) |
| Measure of interaction on additive scale       |         |           |              | RERI (95% CI) =         | 1.65 (0.59, 2.72)    |              |
| Measure of interaction on multiplicative scale |         |           |              | Ratio of ORs (95% CI) = | 2.86 (2.48, 3.24)    |              |
| <u>Shelter</u>                                 |         |           |              |                         |                      |              |
| No Social Support                              | 54/295  | Reference |              | 129/386                 | 2.20                 | (1.56, 3.11) |
| Social Support                                 | 76/881  | 0.68      | (0.55, 0.86) | 121/325                 | 3.28                 | (2.23, 4.83) |
| Measure of interaction on additive scale       |         |           |              | RERI (95% CI) =         | 1.39 (0.73, 2.05)    |              |
| Measure of interaction on multiplicative scale |         |           |              | Ratio of ORs (95% CI) = | 2.18 (1.79, 2.56)    |              |
| <u>Respect</u>                                 |         |           |              |                         |                      |              |
| No Social Support                              | 242/294 | Reference |              | 204/366                 | 0.20                 | (0.14, 0.28) |
| Social Support                                 | 744/871 | 1.65      | (1.32, 2.06) | 175/315                 | 0.18                 | (0.12, 0.27) |
| Measure of interaction on additive scale       |         |           |              | RERI (95% CI) =         | -0.67 (-1.06, -0.28) |              |
| Measure of interaction on multiplicative scale |         |           |              | Ratio of ORs (95% CI) = | 0.54 (0.15, 0.93)    |              |

Freedom

|                                                |         |                   |                         |                     |              |
|------------------------------------------------|---------|-------------------|-------------------------|---------------------|--------------|
| No Social Support                              | 180/278 | Reference         | 159/374                 | 0.32                | (0.23, 0.44) |
| Social Support                                 | 517/854 | 1.24 (1.03, 1.50) | 136/309                 | 0.34                | (0.24, 0.48) |
| Measure of interaction on additive scale       |         |                   | RERI (95% CI) =         | -0.22 (-0.50, 0.05) |              |
| Measure of interaction on multiplicative scale |         |                   | Ratio of ORs (95% CI) = | 0.85 (0.50, 1.20)   |              |

**Supplementary Table 9.** Estimates and 95% confidence intervals from multiple imputations of multilevel models testing social support as an effect modifier of temporal changes in well-being in Syria.

|                  | Problems                   | Pain                       | Rested                     | Health Care                | Cannot Afford Food         | Cannot Afford Shelter      | Life Sat.                  | Hope                       | Pos. Emot.                 | Neg. Emot.                 | Respect                    | Freedom                    |
|------------------|----------------------------|----------------------------|----------------------------|----------------------------|----------------------------|----------------------------|----------------------------|----------------------------|----------------------------|----------------------------|----------------------------|----------------------------|
| Intercept        | -1.336<br>[-1.602, -1.069] | -0.350<br>[-0.555, -0.146] | 0.416<br>[0.233, 0.598]    | 0.152<br>[-0.062, 0.365]   | -0.943<br>[-1.153, -0.734] | -1.433<br>[-1.655, -1.211] | 4.474<br>[4.272, 4.677]    | 5.425<br>[5.170, 5.681]    | 0.610<br>[0.579, 0.641]    | 0.434<br>[0.406, 0.461]    | 1.718<br>[1.482, 1.953]    | 0.699<br>[0.515, 0.882]    |
| Year             | -0.469<br>[-0.873, -0.065] | -1.775<br>[-2.136, -1.415] | -0.433<br>[-0.741, -0.126] | -0.838<br>[-1.136, -0.539] | 1.031<br>[0.709, 1.352]    | 0.790<br>[0.445, 1.134]    | -1.598<br>[-1.938, -1.258] | -0.505<br>[-0.921, -0.089] | -0.191<br>[-0.243, -0.139] | 0.233<br>[0.190, 0.275]    | -1.604<br>[-1.947, -1.261] | -1.145<br>[-1.458, -0.832] |
| Sex              | 0.250<br>[0.015, 0.485]    | 0.236<br>[0.062, 0.409]    | 0.047<br>[-0.117, 0.212]   | -0.126<br>[-0.286, 0.035]  | -0.263<br>[-0.467, -0.058] | -0.306<br>[-0.512, -0.101] | 0.299<br>[0.117, 0.480]    | 0.369<br>[0.145, 0.593]    | 0.002<br>[-0.026, 0.031]   | 0.013<br>[-0.010, 0.036]   | -0.278<br>[-0.485, -0.071] | -0.060<br>[-0.229, 0.110]  |
| Age              | -0.037<br>[-0.151, 0.077]  | 0.166<br>[0.083, 0.249]    | 0.037<br>[-0.042, 0.116]   | -0.043<br>[-0.120, 0.035]  | 0.096<br>[0.003, 0.189]    | 0.047<br>[-0.045, 0.140]   | 0.013<br>[-0.075, 0.101]   | 0.024<br>[-0.082, 0.129]   | -0.012<br>[-0.025, 0.002]  | 0.014<br>[0.003, 0.026]    | -0.095<br>[-0.195, 0.004]  | -0.008<br>[-0.089, 0.073]  |
| Support          | -0.386<br>[-0.645, -0.126] | -0.373<br>[-0.576, -0.170] | 0.379<br>[0.196, 0.561]    | 0.601<br>[0.416, 0.786]    | -0.709<br>[-0.926, -0.492] | -0.379<br>[-0.602, -0.156] | 0.893<br>[0.682, 1.104]    | 0.980<br>[0.719, 1.242]    | 0.057<br>[0.025, 0.090]    | -0.158<br>[-0.185, -0.132] | 0.500<br>[0.275, 0.724]    | 0.215<br>[0.025, 0.406]    |
| Year X Sex       | -0.550<br>[-0.989, -0.110] | -0.429<br>[-0.800, -0.058] | -0.072<br>[-0.398, 0.254]  | 0.322<br>[0.011, 0.633]    | 0.247<br>[-0.107, 0.600]   | 0.451<br>[0.079, 0.823]    | -0.488<br>[-0.830, -0.146] | -0.289<br>[-0.701, 0.123]  | -0.023<br>[-0.076, 0.029]  | -0.011<br>[-0.054, 0.032]  | 0.505<br>[0.140, 0.869]    | -0.171<br>[-0.502, 0.160]  |
| Year X Age       | 0.173<br>[-0.026, 0.372]   | 0.081<br>[-0.081, 0.243]   | -0.163<br>[-0.317, -0.009] | 0.093<br>[-0.051, 0.237]   | -0.176<br>[-0.337, -0.016] | -0.034<br>[-0.200, 0.132]  | -0.040<br>[-0.203, 0.123]  | -0.075<br>[-0.265, 0.116]  | 0.019<br>[-0.006, 0.044]   | -0.024<br>[-0.044, -0.003] | 0.179<br>[0.005, 0.352]    | -0.001<br>[-0.154, 0.151]  |
| Sex X Age        | 0.009<br>[-0.153, 0.170]   | -0.032<br>[-0.149, 0.086]  | -0.027<br>[-0.140, 0.087]  | 0.093<br>[-0.017, 0.203]   | -0.132<br>[-0.270, 0.005]  | -0.046<br>[-0.185, 0.094]  | -0.042<br>[-0.167, 0.083]  | -0.114<br>[-0.267, 0.040]  | -0.018<br>[-0.037, 0.002]  | -0.005<br>[-0.021, 0.011]  | 0.003<br>[-0.136, 0.142]   | 0.116<br>[-0.001, 0.234]   |
| Year X Support   | 0.314<br>[-0.178, 0.805]   | 0.463<br>[0.041, 0.886]    | -0.515<br>[-0.857, -0.174] | -0.690<br>[-1.037, -0.342] | 1.052<br>[0.672, 1.432]    | 0.777<br>[0.390, 1.164]    | -1.353<br>[-1.748, -0.958] | -1.335<br>[-1.796, -0.875] | -0.114<br>[-0.173, -0.054] | 0.212<br>[0.163, 0.261]    | -0.611<br>[-1.000, -0.222] | -0.159<br>[-0.508, 0.190]  |
| Year X Sex X Age | 0.048<br>[-0.239, 0.336]   | -0.038<br>[-0.275, 0.198]  | 0.185<br>[-0.035, 0.404]   | -0.105<br>[-0.311, 0.101]  | 0.250<br>[0.012, 0.488]    | -0.049<br>[-0.297, 0.200]  | 0.021<br>[-0.211, 0.253]   | 0.254<br>[-0.024, 0.532]   | 0.022<br>[-0.013, 0.058]   | 0.001<br>[-0.028, 0.031]   | 0.009<br>[-0.233, 0.251]   | -0.162<br>[-0.385, 0.061]  |



**Supplementary Table 10.** Estimates and 95% confidence intervals from multilevel modeling testing social support as an effect modifier of temporal changes in well-being in Syria.

|                                             | Problems         | Pain             | Rested           | Health Care      | Cannot Afford Food | Cannot Afford Shelter | Life Sat.        | Hope             | Pos. Emot.       | Neg. Emot.       | Respect          | Freedom          |
|---------------------------------------------|------------------|------------------|------------------|------------------|--------------------|-----------------------|------------------|------------------|------------------|------------------|------------------|------------------|
| <b>Social Support as an Effect Modifier</b> |                  |                  |                  |                  |                    |                       |                  |                  |                  |                  |                  |                  |
| N                                           | 6743             | 7691             | 8094             | 7463             | 7108               | 8174                  | 8634             | 8018             | 8736             | 8734             | 7889             | 8136             |
| Intercept                                   | -1.374           | -0.306           | 0.416            | 0.097            | -0.798             | -1.433                | 4.507            | 5.302            | 0.608            | 0.435            | 1.763            | 0.699            |
|                                             | [-1.662; -1.087] | [-0.511; -0.100] | [0.233; 0.598]   | [-0.108; 0.302]  | [-1.014; -0.583]   | [-1.655; -1.211]      | [4.303; 4.711]   | [5.056; 5.549]   | [0.576; 0.640]   | [0.407; 0.462]   | [1.518; 2.008]   | [0.515; 0.882]   |
| Year                                        | -0.482           | -1.946           | -0.433           | -0.873           | 0.791              | 0.790                 | -1.639           | -0.355           | -0.191           | 0.228            | -1.717           | -1.145           |
|                                             | [-0.903; -0.061] | [-2.319; -1.573] | [-0.741; -0.126] | [-1.177; -0.569] | [0.460; 1.123]     | [0.445; 1.134]        | [-1.984; -1.295] | [-0.769; 0.060]  | [-0.244; -0.137] | [0.184; 0.272]   | [-2.073; -1.361] | [-1.458; -0.832] |
| Sex                                         | 0.305            | 0.238            | 0.047            | -0.115           | -0.342             | -0.306                | 0.314            | 0.376            | -0.001           | 0.012            | -0.336           | -0.060           |
|                                             | [0.062; 0.547]   | [0.062; 0.415]   | [-0.117; 0.212]  | [-0.278; 0.047]  | [-0.549; -0.135]   | [-0.512; -0.101]      | [0.130; 0.498]   | [0.154; 0.597]   | [-0.030; 0.028]  | [-0.012; 0.035]  | [-0.547; -0.124] | [-0.229; 0.110]  |
| Age                                         | -0.036           | 0.154            | 0.037            | -0.041           | 0.133              | 0.047                 | 0.013            | 0.017            | -0.013           | 0.016            | -0.113           | -0.008           |
|                                             | [-0.153; 0.081]  | [0.070; 0.237]   | [-0.042; 0.116]  | [-0.120; 0.037]  | [0.038; 0.228]     | [-0.045; 0.140]       | [-0.076; 0.102]  | [-0.089; 0.122]  | [-0.027; 0.000]  | [0.005; 0.027]   | [-0.214; -0.011] | [-0.089; 0.073]  |
| Support                                     | -0.391           | -0.414           | 0.379            | 0.661            | -0.867             | -0.379                | 0.898            | 1.121            | 0.063            | -0.162           | 0.502            | 0.215            |
|                                             | [-0.648; -0.133] | [-0.615; -0.213] | [0.196; 0.561]   | [0.479; 0.843]   | [-1.080; -0.654]   | [-0.602; -0.156]      | [0.689; 1.106]   | [0.867; 1.375]   | [0.031; 0.095]   | [-0.189; -0.136] | [0.275; 0.729]   | [0.025; 0.406]   |
| Year X Sex                                  | -0.723           | -0.436           | -0.072           | 0.346            | 0.311              | 0.451                 | -0.495           | -0.241           | -0.005           | -0.014           | 0.683            | -0.171           |
|                                             | [-1.198; -0.248] | [-0.833; -0.040] | [-0.398; 0.254]  | [0.021; 0.670]   | [-0.063; 0.685]    | [0.079; 0.823]        | [-0.854; -0.135] | [-0.668; 0.186]  | [-0.061; 0.051]  | [-0.060; 0.032]  | [0.302; 1.064]   | [-0.502; 0.160]  |
| Year X Age                                  | 0.186            | 0.125            | -0.163           | 0.091            | -0.269             | -0.034                | -0.040           | -0.050           | 0.024            | -0.029           | 0.233            | -0.001           |
|                                             | [-0.024; 0.396]  | [-0.044; 0.294]  | [-0.317; -0.009] | [-0.059; 0.242]  | [-0.439; -0.100]   | [-0.200; 0.132]       | [-0.209; 0.128]  | [-0.247; 0.147]  | [-0.002; 0.050]  | [-0.051; -0.008] | [0.053; 0.413]   | [-0.154; 0.151]  |
| Sex X Age                                   | 0.002            | -0.062           | -0.027           | 0.101            | -0.166             | -0.046                | -0.036           | -0.108           | -0.014           | -0.007           | -0.007           | 0.116            |
|                                             | [-0.163; 0.168]  | [-0.181; 0.057]  | [-0.140; 0.087]  | [-0.011; 0.212]  | [-0.310; -0.023]   | [-0.185; 0.094]       | [-0.163; 0.090]  | [-0.260; 0.044]  | [-0.034; 0.006]  | [-0.023; 0.009]  | [-0.148; 0.135]  | [-0.001; 0.234]  |
| Year X Support                              | 0.316            | 0.595            | -0.515           | -0.831           | 1.437              | 0.777                 | -1.426           | -1.658           | -0.127           | 0.225            | -0.640           | -0.159           |
|                                             | [-0.168; 0.800]  | [0.181; 1.008]   | [-0.857; -0.174] | [-1.171; -0.491] | [1.057; 1.816]     | [0.390; 1.164]        | [-1.807; -1.044] | [-2.116; -1.200] | [-0.186; -0.068] | [0.177; 0.274]   | [-1.035; -0.246] | [-0.508; 0.190]  |
| Year X Sex X Age                            | 0.067            | 0.043            | 0.185            | -0.121           | 0.307              | -0.049                | 0.006            | 0.249            | 0.014            | 0.010            | 0.044            | -0.162           |
|                                             | [-0.238; 0.373]  | [-0.204; 0.289]  | [-0.035; 0.404]  | [-0.337; 0.095]  | [0.051; 0.562]     | [-0.297; 0.200]       | [-0.236; 0.247]  | [-0.037; 0.536]  | [-0.024; 0.051]  | [-0.021; 0.041]  | [-0.210; 0.298]  | [-0.385; 0.061]  |

**Supplementary Table 11.** Descriptive statistics of well-being measures for Syria and the World with Syria's rank of well-being among 163 countries.

| Variables                              | Measure    | 2006   | 2007   | 2008   | 2009   | 2010     | 2011       | 2012          | 2013        | 2014   | 2015        | 2016   |
|----------------------------------------|------------|--------|--------|--------|--------|----------|------------|---------------|-------------|--------|-------------|--------|
| Number of Participants                 |            | 129037 | 104755 | 133501 | 139049 | 155861   | 198400     | 231460        | 138171      | 190344 | 152256      | 149724 |
| Number of Countries                    |            | 123    | 96     | 121    | 115    | 124      | 148        | 142           | 136         | 148    | 141         | 141    |
| <b>Physical Well-being</b>             |            |        |        |        |        |          |            |               |             |        |             |        |
| Health Problems                        | World      | 24.8%  | 24.5%  | 24.8%  | 25.8%  | 25.2%    | 23.9%      | 23.6%         | 24.0%       | 24.1%  | 24.3%       | 25.4%  |
|                                        | Syria      |        |        | 25.3%  | 23.2%  | 12.0%    | 12.0%      | 11.0%         | 15.0%       |        | 17.0%       |        |
|                                        | Syria rank |        |        | 67     | 44.5   | <b>2</b> | <b>3</b>   | 1.5           | 8           |        | 21.5        |        |
| Physical Pain                          | World      | 27.0%  | 25.5%  | 26.9%  | 27.3%  | 26.9%    | 28.4%      | 29.4%         | 30.5%       | 31.1%  | 31.0%       | 33.0%  |
|                                        | Syria      |        |        | 38.0%  | 33.0%  | 16.2%    | 26.3%      | 16.3%         | 14.4%       |        | 15.0%       |        |
|                                        | Syria rank |        |        | 107    | 91.5   | 10       | 62.5       | 7             | <b>2</b>    |        | <b>1.5</b>  |        |
| Well-Rested                            | World      | 65.2%  | 66.8%  | 66.9%  | 68.3%  | 69.6%    | 67.8%      | 67.6%         | 66.2%       | 66.3%  | 66.8%       | 66.7%  |
|                                        | Syria      |        |        | 56.6%  | 65.7%  | 60.2%    | 66.7%      | 64.3%         | 37.8%       |        | 35.8%       |        |
|                                        | Syria rank |        |        | 102    | 77     | 98.5     | 82.5       | 90.5          | <b>136*</b> |        | <b>141*</b> |        |
| Satisfactory Access to Health Care     | World      | 56.5%  | 56.5%  | 56.5%  | 56.5%  | 56.5%    | 56.5%      | 56.5%         | 56.5%       | 56.5%  | 56.5%       | 56.5%  |
|                                        | Syria      |        |        | 54.1%  | 68.4%  | 77.1%    | 38.9%      | 31.9%         | 39.8%       |        | 39.2%       |        |
|                                        | Syria rank |        |        | 71     | 32     | 22       | 113        | 101           | 101         |        | 110.5       |        |
| Cannot Afford Food                     | World      | 29.6%  | 30.7%  | 32.1%  | 30.8%  | 30.5%    | 32.2%      | 31.7%         | 33.7%       | 33.7%  | 33.8%       | 36.0%  |
|                                        | Syria      |        |        | 16.5%  | 16.0%  |          | 37.1%      | 41.9%         | 57.0%       |        | 48.1%       |        |
|                                        | Syria rank |        |        | 36     | 28.5   |          | 91         | 98            | 112         |        | 98          |        |
| Cannot Afford Shelter                  | World      | 19.7%  | 21.0%  | 20.0%  | 20.3%  | 21.2%    | 21.4%      | 22.9%         | 23.4%       | 23.8%  | 23.8%       | 26.8%  |
|                                        | Syria      |        |        | 13.4%  | 20.0%  | 25.5%    | 19.6%      | 29.9%         | 44.6%       |        | 34.8%       |        |
|                                        | Syria rank |        |        | 48     | 62     | 78.5     | 73         | 98            | 119         |        | 106         |        |
| <b>Mental Well-being</b>               |            |        |        |        |        |          |            |               |             |        |             |        |
| Average Life Satisfaction<br>(0 to 10) | World      | 5.4    | 5.5    | 5.5    | 5.5    | 5.5      | 5.4        | 5.5           | 5.4         | 5.4    | 5.4         | 5.4    |
|                                        | Syria      |        |        | 5.3    | 5.0    | 4.5      | 4.0        | 3.2           | 2.7         |        | 3.5         |        |
|                                        | Syria rank |        |        | 56     | 76     | 97.5     | 133.5      | <b>141.5*</b> | <b>135*</b> |        | <b>138</b>  |        |
| Average Hope<br>(0 to 10)              | World      | 6.8    | 6.8    | 6.7    | 6.7    | 6.7      | 6.7        | 6.7           | 6.7         | 6.8    | 6.8         | 6.8    |
|                                        | Syria      |        |        | 6.3    | 6.3    | 5.7      | 5.2        | 5.4           | 5.6         |        | 4.9         |        |
|                                        | Syria rank |        |        | 74     | 71.5   | 104      | 133.5      | 123           | 112.5       |        | <b>133</b>  |        |
| Positive Emotions                      | World      | 71.5%  | 71.9%  | 70.7%  | 70.6%  | 70.9%    | 70.4%      | 70.9%         | 70.9%       | 70.9%  | 71.0%       | 71.2%  |
|                                        | Syria      |        |        | 62.6%  | 58.4%  | 53.5%    | 65.2%      | 48.4%         | 38.8%       |        | 37.0%       |        |
|                                        | Syria rank |        |        | 88     | 94     | 112      | 98.5       | <b>140</b>    | <b>136*</b> |        | <b>141*</b> |        |
| Negative Emotions                      | World      | 26.6%  | 24.9%  | 25.0%  | 25.1%  | 25.0%    | 26.0%      | 27.3%         | 28.7%       | 28.6%  | 29.4%       | 30.1%  |
|                                        | Syria      |        |        | 37.7%  | 32.5%  | 26.7%    | 51.2%      | 66.6%         | 64.8%       |        | 62.5%       |        |
|                                        | Syria rank |        |        | 110    | 98     | 76       | <b>147</b> | <b>142*</b>   | <b>136*</b> |        | <b>141*</b> |        |
| <b>Social Well-being</b>               |            |        |        |        |        |          |            |               |             |        |             |        |
| Social Support                         | World      | 84.8%  | 80.9%  | 79.0%  | 82.0%  | 83.2%    | 80.2%      | 80.7%         | 80.5%       | 80.4%  | 79.6%       | 81.0%  |
|                                        | Syria      |        |        | 71.7%  | 84.0%  | 92.8%    | 57.9%      | 58.7%         | 58.8%       |        | 46.8%       |        |
|                                        | Syria rank |        |        | 86.5   | 54.5   | 20       | 137        | 135           | 129         |        | <b>140</b>  |        |
| Respect                                | World      | 85.2%  | 84.4%  | 85.0%  | 87.0%  | 88.0%    | 86.9%      | 87.1%         | 86.2%       | 86.0%  | 87.0%       | 87.9%  |

|         |            |       |       |       |       |       |       |            |            |       |             |       |
|---------|------------|-------|-------|-------|-------|-------|-------|------------|------------|-------|-------------|-------|
|         | Syria      |       |       | 80.8% | 91.9% | 87.8% | 78.8% | 67.9%      | 61.4%      |       | 57.6%       |       |
|         | Syria rank |       |       | 81    | 37    | 77    | 130   | <b>138</b> | <b>134</b> |       | <b>141*</b> |       |
| Freedom | World      | 73.5% | 70.7% | 69.2% | 68.9% | 70.9% | 73.4% | 71.2%      | 72.8%      | 73.7% | 74.9%       | 76.4% |
|         | Syria      |       |       | 65.6% | 75.0% | 65.2% | 52.8% | 47.1%      | 46.0%      |       | 45.3%       |       |
|         | Syria rank |       |       | 62    | 44    | 83    | 132   | 130        | 128        |       | <b>134</b>  |       |

Note. Bolded numbers highlight years when Syria ranked in the top or bottom 5 in a specific wave. Asterisks highlight years when Syria ranked the lowest in the sample.

**Supplementary Table 12.** Estimates and 95% confidence intervals of physical, mental, and social well-being in WHO regions and Syria in 2006-2016.

|                         | Health Problems              | Pain                          | Rested                        | Health Care                     | Cannot Afford Food            | Cannot Afford Shelter         | Life Sat.                     | Hope                          | Pos. Emot.                    | Neg. Emot.                    | Support                       | Respect                       | Freedom                       |
|-------------------------|------------------------------|-------------------------------|-------------------------------|---------------------------------|-------------------------------|-------------------------------|-------------------------------|-------------------------------|-------------------------------|-------------------------------|-------------------------------|-------------------------------|-------------------------------|
| Number of countries     | 162                          | 163                           | 163                           | 163                             | 162                           | 162                           | 163                           | 156                           | 163                           | 163                           | 162                           | 163                           | 163                           |
| Number of observations  | 1419                         | 1422                          | 1422                          | 1422                            | 1407                          | 1407                          | 1424                          | 1346                          | 1428                          | 1424                          | 1420                          | 1425                          | 1397                          |
| Intercept               | 0.203<br>[0.096;<br>0.309]   | 0.330<br>[0.206;<br>0.454]    | 0.673<br>[0.528;<br>0.818]    | 0.641<br>[0.309;<br>0.974]      | 0.166<br>[-0.113;<br>0.446]   | 0.155<br>[-0.096;<br>0.406]   | 5.095<br>[3.335;<br>6.855]    | 6.226<br>[4.615;<br>7.838]    | 0.643<br>[0.467;<br>0.818]    | 0.315<br>[0.192;<br>0.439]    | 0.834<br>[0.629;<br>1.040]    | 0.903<br>[0.757;<br>1.049]    | 0.701<br>[0.419;<br>0.983]    |
| Year                    | -0.084<br>[-0.194;<br>0.026] | -0.228<br>[-0.348;<br>-0.108] | -0.268<br>[-0.384;<br>-0.152] | -0.317*<br>[-0.515; -<br>0.118] | 0.409<br>[0.216;<br>0.602]    | 0.253<br>[0.064;<br>0.441]    | -2.375<br>[-3.403;<br>-1.348] | -1.331<br>[-2.518;<br>-0.145] | -0.274<br>[-0.388;<br>-0.159] | 0.386<br>[0.267;<br>0.506]    | -0.360<br>[-0.490;<br>-0.231] | -0.337<br>[-0.435;<br>-0.239] | -0.298<br>[-0.498;<br>-0.098] |
| Africa                  | 0.058<br>[-0.050;<br>0.166]  | -0.035<br>[-0.160;<br>0.090]  | -0.009<br>[-0.155;<br>0.138]  | -0.250<br>[-0.587;<br>0.086]    | 0.387<br>[0.104;<br>0.669]    | 0.138<br>[-0.116;<br>0.393]   | -0.738<br>[-2.521;<br>1.045]  | 0.382<br>[-1.251;<br>2.016]   | 0.030<br>[-0.148;<br>0.207]   | -0.102<br>[-0.227;<br>0.024]  | -0.121<br>[-0.329;<br>0.087]  | -0.083<br>[-0.231;<br>0.064]  | -0.052<br>[-0.337;<br>0.233]  |
| America                 | 0.022<br>[-0.087;<br>0.130]  | -0.048<br>[-0.174;<br>0.078]  | 0.043<br>[0.104;<br>0.190]    | -0.039<br>[-0.377;<br>0.300]    | 0.170<br>[-0.114;<br>0.455]   | 0.027<br>[-0.228;<br>0.283]   | 0.980<br>[-0.811;<br>2.771]   | 1.029<br>[-0.613;<br>2.671]   | 0.157<br>[-0.021;<br>0.336]   | -0.042<br>[-0.167;<br>0.084]  | 0.033<br>[-0.176;<br>0.242]   | 0.002<br>[-0.147;<br>0.150]   | 0.041<br>[-0.246;<br>0.328]   |
| SE. Asia                | 0.053<br>[-0.060;<br>0.167]  | -0.082<br>[-0.214;<br>0.049]  | 0.040<br>[-0.114;<br>0.193]   | 0.033<br>[-0.320;<br>0.386]     | 0.059<br>[-0.238;<br>0.355]   | 0.015<br>[-0.252;<br>0.282]   | -0.199<br>[-2.068;<br>1.669]  | 0.270<br>[-1.442;<br>1.981]   | 0.112<br>[-0.074;<br>0.298]   | -0.100<br>[-0.231;<br>0.031]  | -0.088<br>[-0.306;<br>0.130]  | -0.189<br>[-0.344;<br>-0.034] | 0.005<br>[-0.295;<br>0.304]   |
| Europe                  | 0.058<br>[-0.050;<br>0.165]  | -0.075<br>[-0.199;<br>0.050]  | -0.049<br>[-0.195;<br>0.097]  | -0.017<br>[-0.353;<br>0.318]    | 0.025<br>[-0.257;<br>0.307]   | 0.004<br>[-0.250;<br>0.257]   | 0.798<br>[-0.979;<br>2.575]   | 0.444<br>[-1.183;<br>2.071]   | 0.040<br>[-0.137;<br>0.217]   | -0.058<br>[-0.183;<br>0.067]  | 0.037<br>[-0.170;<br>0.244]   | -0.023<br>[-0.170;<br>0.124]  | 0.009<br>[-0.276;<br>0.293]   |
| E. Mediterranean        | 0.036<br>[-0.073;<br>0.146]  | 0.004<br>[-0.123;<br>0.131]   | 0.011<br>[-0.137;<br>0.160]   | -0.089<br>[-0.430;<br>0.251]    | 0.068<br>[-0.219;<br>0.354]   | 0.056<br>[-0.202;<br>0.313]   | 0.304<br>[-1.500;<br>2.108]   | 0.495<br>[-1.159;<br>2.148]   | 0.013<br>[-0.167;<br>0.193]   | -0.007<br>[-0.134;<br>0.120]  | -0.052<br>[-0.263;<br>0.159]  | -0.036<br>[-0.186;<br>0.113]  | -0.034<br>[-0.323;<br>0.255]  |
| W. Pacific              | 0.017<br>[-0.093;<br>0.127]  | -0.120<br>[-0.248;<br>0.007]  | 0.048<br>[-0.101;<br>0.197]   | 0.065<br>[-0.278;<br>0.408]     | 0.078<br>[-0.210;<br>0.366]   | 0.042<br>[-0.217;<br>0.301]   | 0.379<br>[-1.437;<br>2.196]   | 0.438<br>[-1.228;<br>2.103]   | 0.095<br>[-0.086;<br>0.276]   | -0.073<br>[-0.200;<br>0.054]  | -0.022<br>[-0.234;<br>0.190]  | -0.099<br>[-0.250;<br>0.051]  | 0.096<br>[-0.195;<br>0.386]   |
| Year X Africa           | 0.111<br>[-0.000;<br>0.222]  | 0.307<br>[0.186;<br>0.428]    | 0.263<br>[0.146;<br>0.380]    | 0.333<br>[0.132;<br>0.534]      | -0.376<br>[-0.572;<br>-0.181] | -0.155<br>[-0.345;<br>0.036]  | 2.240<br>[1.201;<br>3.279]    | 1.402<br>[0.201;<br>2.602]    | 0.282<br>[0.167;<br>0.398]    | -0.311<br>[-0.432;<br>-0.190] | 0.362<br>[0.231;<br>0.493]    | 0.347<br>[0.248;<br>0.445]    | 0.348<br>[0.146;<br>0.551]    |
| Year X America          | 0.073<br>[-0.039;<br>0.184]  | 0.276<br>[0.154;<br>0.397]    | 0.259<br>[0.142;<br>0.376]    | 0.264<br>[0.062;<br>0.465]      | -0.367<br>[-0.563;<br>-0.170] | -0.200<br>[-0.391;<br>-0.009] | 2.483<br>[1.441;<br>3.525]    | 1.623<br>[0.418;<br>2.828]    | 0.280<br>[0.164;<br>0.396]    | -0.343<br>[-0.464;<br>-0.222] | 0.341<br>[0.210;<br>0.472]    | 0.348<br>[0.249;<br>0.447]    | 0.347<br>[0.144;<br>0.549]    |
| Year X SE. Asia         | 0.088<br>[-0.027;<br>0.203]  | 0.310<br>[0.185;<br>0.436]    | 0.277<br>[0.157;<br>0.398]    | 0.380<br>[0.170;<br>0.590]      | -0.305<br>[-0.509;<br>-0.101] | -0.160<br>[-0.359;<br>0.039]  | 2.415<br>[1.336;<br>3.495]    | 1.429<br>[0.182;<br>2.675]    | 0.287<br>[0.167;<br>0.407]    | -0.345<br>[-0.470;<br>-0.220] | 0.377<br>[0.242;<br>0.513]    | 0.412<br>[0.310;<br>0.513]    | 0.413<br>[0.203;<br>0.624]    |
| Year X Europe           | 0.071<br>[-0.040;<br>0.182]  | 0.243<br>[0.123;<br>0.364]    | 0.286<br>[0.170;<br>0.403]    | 0.330<br>[0.130;<br>0.530]      | -0.407<br>[-0.601;<br>-0.212] | -0.254<br>[-0.444;<br>-0.065] | 2.446<br>[1.411;<br>3.481]    | 1.275<br>[0.080;<br>2.469]    | 0.284<br>[0.169;<br>0.399]    | -0.377<br>[-0.497;<br>-0.256] | 0.357<br>[0.227;<br>0.488]    | 0.352<br>[0.253;<br>0.450]    | 0.331<br>[0.129;<br>0.532]    |
| Year X E. Mediterranean | 0.053<br>[-0.040;<br>0.182]  | 0.277<br>[0.123;<br>0.364]    | 0.246<br>[0.170;<br>0.403]    | 0.305<br>[0.130;<br>0.530]      | -0.312<br>[-0.601;<br>-0.212] | -0.203<br>[-0.444;<br>-0.065] | 2.182<br>[1.411;<br>3.481]    | 1.256<br>[0.080;<br>2.469]    | 0.259<br>[0.169;<br>0.399]    | -0.346<br>[-0.497;<br>-0.256] | 0.315<br>[0.227;<br>0.488]    | 0.364<br>[0.253;<br>0.450]    | 0.319<br>[0.129;<br>0.532]    |

|                   |                    |                   |                   |                   |                     |                     |                   |                   |                   |                     |                   |                   |                   |
|-------------------|--------------------|-------------------|-------------------|-------------------|---------------------|---------------------|-------------------|-------------------|-------------------|---------------------|-------------------|-------------------|-------------------|
|                   | [-0.059;<br>0.166] | [0.155;<br>0.400] | [0.128;<br>0.364] | [0.102;<br>0.509] | [-0.510;<br>-0.114] | [-0.396;<br>-0.010] | [1.132;<br>3.232] | [0.042;<br>2.470] | [0.142;<br>0.376] | [-0.469;<br>-0.224] | [0.183;<br>0.447] | [0.265;<br>0.464] | [0.114;<br>0.524] |
| Year X W. Pacific | 0.092              | 0.266             | 0.287             | 0.329             | -0.374              | -0.201              | 2.518             | 1.506             | 0.293             | -0.364              | 0.361             | 0.368             | 0.325             |
|                   | [-0.021;<br>0.204] | [0.143;<br>0.388] | [0.168;<br>0.405] | [0.126;<br>0.533] | [-0.572;<br>-0.176] | [-0.395;<br>-0.008] | [1.467;<br>3.569] | [0.290;<br>2.722] | [0.176;<br>0.410] | [-0.486;<br>-0.242] | [0.229;<br>0.493] | [0.269;<br>0.468] | [0.120;<br>0.530] |

---

**Supplementary Table 13.** Estimated changes and 95% confidence intervals of physical, mental, and social well-being in WHO regions and Syria in 2006-2016.

|                       | Syria         | E.<br>Mediterranean | Africa       | America       | SE. Asia     | Europe       | W.<br>Pacific |
|-----------------------|---------------|---------------------|--------------|---------------|--------------|--------------|---------------|
| Health Problems       | -0.084        | <b>-0.031</b>       | 0.027        | -0.011        | 0.004        | -0.013       | -0.008        |
| Lower CI              | -0.194        | -0.054              | 0.011        | -0.029        | -0.031       | -0.026       | -0.016        |
| Upper CI              | 0.026         | -0.008              | 0.043        | 0.007         | 0.038        | 0.000        | 0.032         |
| Pain                  | <b>-0.228</b> | <b>0.049</b>        | <b>0.081</b> | <b>0.048</b>  | <b>0.082</b> | <b>0.015</b> | <b>0.038</b>  |
| Lower CI              | -0.349        | 0.024               | 0.064        | 0.029         | 0.045        | 0.001        | 0.013         |
| Upper CI              | -0.108        | 0.074               | 0.098        | 0.067         | 0.119        | 0.029        | 0.063         |
| Rested                | <b>-0.268</b> | -0.022              | -0.005       | -0.009        | 0.009        | 0.018        | 0.019         |
| Lower CI              | -0.384        | -0.045              | -0.021       | -0.023        | -0.025       | 0.006        | -0.004        |
| Upper CI              | -0.152        | 0.001               | 0.011        | 0.009         | 0.043        | 0.030        | 0.042         |
| Health Care           | <b>-0.317</b> | -0.012              | 0.017        | <b>-0.053</b> | 0.063        | 0.015        | 0.012         |
| Lower CI              | -0.516        | -0.057              | -0.014       | -0.088        | -0.005       | -0.010       | -0.034        |
| Upper CI              | -0.117        | 0.033               | 0.048        | -0.005        | 0.131        | 0.040        | 0.058         |
| Cannot Afford Food    | <b>0.409</b>  | <b>0.097</b>        | <b>0.015</b> | <b>0.042</b>  | <b>0.104</b> | 0.003        | 0.035         |
| Lower CI              | 0.214         | 0.055               | 0.005        | 0.008         | 0.039        | -0.021       | -0.009        |
| Upper CI              | 0.604         | 0.139               | 0.063        | 0.075         | 0.169        | 0.027        | 0.079         |
| Cannot Afford Shelter | <b>0.253</b>  | <b>0.050</b>        | <b>0.099</b> | <b>0.053</b>  | <b>0.093</b> | -0.001       | <b>0.052</b>  |
| Lower CI              | 0.063         | 0.008               | 0.070        | 0.020         | 0.030        | -0.024       | 0.009         |
| Upper CI              | 0.442         | 0.092               | 0.128        | 0.086         | 0.156        | 0.022        | 0.095         |
| Life Satisfaction     | <b>-2.375</b> | -0.193              | -0.132       | 0.108         | 0.040        | 0.068        | 0.143         |
| Lower CI              | -3.407        | -0.410              | -0.285       | -0.063        | -0.292       | -0.052       | -0.079        |
| Upper CI              | -1.344        | 0.024               | 0.021        | 0.279         | 0.372        | 0.188        | 0.365         |
| Hope                  | <b>-1.331</b> | -0.077              | 0.060        | <b>0.291</b>  | 0.098        | -0.057       | 0.175         |
| Lower CI              | -2.526        | -0.337              | -0.124       | 0.079         | -0.288       | -0.198       | -0.093        |
| Upper CI              | -0.136        | 0.183               | 0.244        | 0.503         | 0.484        | 0.084        | 0.443         |
| Positive Emotion      | <b>-0.274</b> | -0.015              | 0.010        | 0.006         | 0.013        | 0.010        | 0.019         |
| Lower CI              | -0.390        | -0.147              | -0.007       | -0.012        | -0.023       | -0.003       | -0.005        |
| Upper CI              | -0.158        | 0.117               | 0.023        | 0.024         | 0.049        | 0.023        | 0.043         |
| Negative Emotion      | <b>0.386</b>  | <b>0.040</b>        | <b>0.075</b> | <b>0.043</b>  | <b>0.041</b> | 0.010        | 0.022         |
| Lower CI              | 0.267         | 0.015               | 0.058        | 0.024         | 0.004        | -0.004       | -0.003        |
| Upper CI              | 0.506         | 0.065               | 0.092        | 0.062         | 0.078        | 0.024        | 0.047         |
| Support               | <b>-0.360</b> | <b>-0.046</b>       | 0.000        | -0.019        | 0.019        | 0.003        | 0.001         |
| Lower CI              | -0.496        | -0.075              | -0.020       | -0.041        | -0.024       | -0.012       | -0.028        |
| Upper CI              | -0.225        | -0.017              | 0.020        | 0.003         | 0.062        | 0.018        | 0.030         |
| Respect               | <b>-0.298</b> | <b>0.021</b>        | <b>0.051</b> | <b>0.049</b>  | <b>0.116</b> | <b>0.032</b> | <b>0.027</b>  |
| Lower CI              | -0.499        | 0.002               | 0.038        | 0.035         | 0.088        | 0.022        | 0.008         |
| Upper CI              | -0.097        | 0.040               | 0.064        | 0.063         | 0.144        | 0.042        | 0.046         |
| Freedom               | <b>-0.337</b> | 0.027               | 0.011        | 0.011         | 0.075        | 0.014        | 0.031         |
| Lower CI              | -0.436        | -0.017              | -0.019       | -0.023        | 0.010        | -0.051       | -0.014        |
| Upper CI              | -0.238        | 0.071               | 0.041        | 0.045         | 0.140        | 0.079        | 0.076         |

Note. The 95%CI of bolded estimates exclude 0.

**Supplementary Table 14.** Estimates and 95% confidence intervals of physical, mental, and social well-being in Syria and countries that experiences war, protests, or disasters in 2006-2016.

|                                  | Health Problems              | Pain                          | Rested                        | Health Care                   | Cannot Afford Food            | Cannot Afford Shelter         | Life Sat.                     | Hope                          | Pos. Emot.                    | Neg. Emot.                    | Support                       | Respect                       | Freedom                       |
|----------------------------------|------------------------------|-------------------------------|-------------------------------|-------------------------------|-------------------------------|-------------------------------|-------------------------------|-------------------------------|-------------------------------|-------------------------------|-------------------------------|-------------------------------|-------------------------------|
| Number of countries              | 34                           | 34                            | 34                            | 34                            | 34                            | 34                            | 34                            | 32                            | 34                            | 34                            | 34                            | 34                            | 34                            |
| Number of observations           | 367                          | 368                           | 368                           | 352                           | 355                           | 357                           | 362                           | 345                           | 368                           | 368                           | 367                           | 368                           | 354                           |
| Intercept                        | 0.167<br>[0.051;<br>0.283]   | 0.232<br>[0.069;<br>0.395]    | 0.558<br>[0.430;<br>0.687]    | 0.506<br>[0.089;<br>0.922]    | 0.341<br>[-0.067;<br>0.750]   | 0.263<br>[-0.008;<br>0.535]   | 4.077<br>[2.010;<br>6.144]    | 5.656<br>[3.985;<br>7.327]    | 0.525<br>[0.349;<br>0.702]    | 0.481<br>[0.332;<br>0.630]    | 0.680<br>[0.449;<br>0.911]    | 0.759<br>[0.606;<br>0.912]    | 0.573<br>[0.318;<br>0.828]    |
| Year to events                   | -0.084<br>[-0.179;<br>0.012] | -0.228<br>[-0.354;<br>-0.103] | -0.268<br>[-0.394;<br>-0.141] | -0.317<br>[-0.525;<br>-0.109] | 0.409<br>[0.195;<br>0.623]    | 0.253<br>[0.066;<br>0.439]    | -2.375<br>[-3.454;<br>-1.297] | -1.331<br>[-2.580;<br>-0.082] | -0.274<br>[-0.384;<br>-0.163] | 0.386<br>[0.255;<br>0.518]    | -0.360<br>[-0.486;<br>-0.235] | -0.337<br>[-0.446;<br>-0.228] | -0.298<br>[-0.490;<br>-0.106] |
| War-torn countries               | 0.074<br>[-0.046;<br>0.194]  | 0.079<br>[-0.089;<br>0.247]   | 0.083<br>[-0.050;<br>0.217]   | 0.058<br>[-0.367;<br>0.483]   | 0.059<br>[-0.359;<br>0.477]   | 0.016<br>[-0.262;<br>0.295]   | 1.068<br>[-1.047;<br>3.184]   | 1.094<br>[-0.627;<br>2.814]   | 0.125<br>[-0.056;<br>0.307]   | -0.171<br>[-0.325;<br>-0.017] | 0.107<br>[-0.131;<br>0.344]   | 0.073<br>[-0.084;<br>0.231]   | 0.125<br>[-0.138;<br>0.388]   |
| Countries with major protests    | 0.085<br>[-0.034;<br>0.204]  | 0.066<br>[-0.101;<br>0.234]   | 0.125<br>[-0.008;<br>0.257]   | 0.028<br>[-0.397;<br>0.452]   | 0.009<br>[-0.408;<br>0.425]   | -0.019<br>[-0.297;<br>0.258]  | 1.189<br>[-0.918;<br>3.296]   | 1.081<br>[-0.628;<br>2.790]   | 0.180<br>[-0.000;<br>0.361]   | -0.211<br>[-0.364;<br>-0.059] | 0.104<br>[-0.132;<br>0.340]   | 0.087<br>[-0.070;<br>0.243]   | 0.141<br>[-0.120;<br>0.403]   |
| Countries with natural disasters | 0.090<br>[-0.028;<br>0.208]  | 0.072<br>[-0.094;<br>0.238]   | 0.112<br>[-0.019;<br>0.243]   | 0.005<br>[-0.418;<br>0.428]   | 0.029<br>[-0.387;<br>0.444]   | 0.006<br>[-0.271;<br>0.282]   | 1.040<br>[-1.061;<br>3.141]   | 1.010<br>[-0.692;<br>2.711]   | 0.169<br>[-0.010;<br>0.349]   | -0.205<br>[-0.356;<br>-0.053] | 0.089<br>[-0.147;<br>0.324]   | 0.074<br>[-0.081;<br>0.230]   | 0.116<br>[-0.144;<br>0.376]   |
| Year X War-torn                  | 0.047<br>[-0.052;<br>0.146]  | 0.242<br>[0.112;<br>0.372]    | 0.268<br>[0.137;<br>0.399]    | 0.360<br>[0.144;<br>0.575]    | -0.364<br>[-0.586;<br>-0.142] | -0.246<br>[-0.440;<br>-0.052] | 2.164<br>[1.045;<br>3.284]    | 1.309<br>[0.008;<br>2.610]    | 0.246<br>[0.132;<br>0.360]    | -0.375<br>[-0.510;<br>-0.239] | 0.393<br>[0.264;<br>0.522]    | 0.373<br>[0.260;<br>0.485]    | 0.322<br>[0.124;<br>0.520]    |
| Year X Protests                  | 0.078<br>[-0.020;<br>0.176]  | 0.270<br>[0.141;<br>0.398]    | 0.267<br>[0.138;<br>0.397]    | 0.287<br>[0.072;<br>0.501]    | -0.373<br>[-0.594;<br>-0.153] | -0.205<br>[-0.398;<br>-0.013] | 2.442<br>[1.332;<br>3.553]    | 1.371<br>[0.085;<br>2.658]    | 0.281<br>[0.168;<br>0.394]    | -0.352<br>[-0.487;<br>-0.217] | 0.348<br>[0.220;<br>0.477]    | 0.356<br>[0.244;<br>0.468]    | 0.323<br>[0.126;<br>0.520]    |
| Year X Disasters                 | 0.076<br>[-0.021;<br>0.173]  | 0.270<br>[0.142;<br>0.397]    | 0.278<br>[0.150;<br>0.407]    | 0.350<br>[0.139;<br>0.562]    | -0.389<br>[-0.607;<br>-0.171] | -0.222<br>[-0.412;<br>-0.031] | 2.405<br>[1.307;<br>3.504]    | 1.253<br>[-0.020;<br>2.526]   | 0.265<br>[0.153;<br>0.377]    | -0.356<br>[-0.489;<br>-0.222] | 0.356<br>[0.229;<br>0.484]    | 0.360<br>[0.249;<br>0.471]    | 0.350<br>[0.155;<br>0.545]    |

**Supplementary Table 15.** Missing Data Pattern. Percentages represent the proportion of completed responses.

| Wave                                                     | 2008   | 2009.1 | 2009.2 | 2010.1 | 2010.2 | 2011.1 | 2011.2 | 2012.1 | 2012.2 | 2013   | 2015   |
|----------------------------------------------------------|--------|--------|--------|--------|--------|--------|--------|--------|--------|--------|--------|
| Sample Size                                              | 1209   | 1082   | 1018   | 1029   | 1006   | 1011   | 1030   | 1025   | 1018   | 1022   | 1002   |
| Sex                                                      | 100.0% | 100.0% | 100.0% | 100.0% | 100.0% | 100.0% | 100.0% | 100.0% | 100.0% | 100.0% | 100.0% |
| Age                                                      | 99.9%  | 100.0% | 99.8%  | 99.9%  | 100.0% | 100.0% | 100.0% | 100.0% | 99.9%  | 100.0% | 100.0% |
| Health Problems                                          | 99.3%  | -      | 99.5%  | 99.7%  | -      | 100.0% | 100.0% | 100.0% | -      | 100.0% | 100.0% |
| Pain                                                     | 99.4%  | 99.9%  | 99.8%  | 99.4%  | -      | 99.3%  | -      | 100.0% | 96.0%  | 97.2%  | 100.0% |
| Well-rested                                              | 98.3%  | 99.6%  | 98.8%  | 98.1%  | -      | 98.9%  | 98.3%  | 95.0%  | 75.0%  | 81.9%  | 81.8%  |
| Health Care                                              | 97.9%  | 98.2%  | -      | 95.7%  | -      | 95.6%  | 94.6%  | -      | 94.0%  | 92.4%  | 96.7%  |
| Cannot Afford Food                                       | 98.7%  | 99.9%  | -      | -      | -      | 97.6%  | 97.0%  | 89.1%  | 84.0%  | 79.0%  | 81.7%  |
| Cannot Afford Shelter                                    | 98.8%  | 99.9%  | 99.6%  | 98.0%  | -      | 96.6%  | 97.5%  | 89.0%  | 84.0%  | 83.2%  | 89.0%  |
| Life Satisfaction                                        | 99.8%  | 100.0% | 99.7%  | 98.7%  | 99.0%  | 100.0% | 99.7%  | 98.2%  | 97.5%  | 96.7%  | 96.1%  |
| Hope                                                     | 83.5%  | 92.2%  | 77.3%  | 82.9%  | 82.7%  | 99.0%  | 98.8%  | 96.9%  | 91.3%  | 90.8%  | 91.6%  |
| Positive Emotion                                         | 99.7%  | 99.8%  | 97.8%  | 100.0% | 98.1%  | 100.0% | 100.0% | 99.6%  | 99.6%  | 100.0% | 100.0% |
| Negative Emotion                                         | 99.7%  | 99.9%  | 99.6%  | 99.8%  | -      | 100.0% | 100.0% | 100.0% | 99.0%  | 100.0% | 100.0% |
| Support                                                  | 98.4%  | 99.4%  | -      | 96.5%  | -      | 95.2%  | 94.8%  | 93.6%  | 91.0%  | 85.7%  | 79.5%  |
| Respect                                                  | 97.8%  | 99.4%  | 99.1%  | 97.8%  | 98.4%  | 99.4%  | 98.9%  | 84.0%  | 86.1%  | 84.0%  | 84.7%  |
| Freedom                                                  | 95.2%  | 97.1%  | 94.9%  | 92.4%  | 93.3%  | 83.1%  | 95.2%  | 81.0%  | 90.0%  | 87.4%  | 85.2%  |
| <b>Exposure Status</b>                                   |        |        |        |        |        |        |        |        |        |        |        |
| Internally Displaced (Self)                              | -      | -      | -      | -      | -      | -      | -      | -      | -      | 91.2%  | 90.9%  |
| Internally Displaced to the Same Governorate (Family)    | -      | -      | -      | -      | -      | -      | -      | -      | -      | 88.3%  | 91.7%  |
| Internally Displaced to a Different Governorate (Family) | -      | -      | -      | -      | -      | -      | -      | -      | -      | 88.9%  | 91.7%  |
| Internally Displaced to Somewhere outside Syria (Family) | -      | -      | -      | -      | -      | -      | -      | -      | -      | 88.5%  | 91.7%  |
| Died (Family)                                            | -      | -      | -      | -      | -      | -      | -      | -      | -      | 84.2%  | 87.8%  |
| Injured (Family)                                         | -      | -      | -      | -      | -      | -      | -      | -      | -      | 85.6%  | 88.3%  |
| Household Lost Main Source of Income                     | -      | -      | -      | -      | -      | -      | -      | -      | -      | 98.1%  | 86.9%  |

Notes. ‘-’ indicates that the measure was not included in a specific survey. In 2009, 2010, 2011, and 2012, Gallup conducted 2 surveys in the same calendar year, and each survey can include different items. The suffices, ‘.1’ or ‘.2’, refers to the first or the second survey in the same year.
